# Supplementary material for: Mechanistic basis for multidrug resistance and collateral drug sensitivity conferred to the malaria parasite by polymorphisms in PfMDR1 and PfCRT
Source: PubMed Central journal article supplement (PMC9067703; doi:10.1371/journal.pbio.3001616), 2022-05-04

# N-terminus

# TMD 1...

- P. falciparum NYSND PF3D7\_0523000
- P. falciparum NFSDD
- P. falciparum YYSND
- P. falciparum FYSND
- P. falciparum YFSND
- P. falciparum NFCDY
- P. falciparum 'inactive' NYSND
- P. knowlesi gi 22105887
- P. vivax gi 290564285
- P. chabaudi gi 2200636
- P. yoelii yoelii gi 8314634
- P. berghel anka gi 68076009
- N. caninum gi 401404748
- S. cerevisiae gi 6322640
- L. major Friedlin gi 157875614
- M. racemosus gi 13641444
- S. mansoni gi 425475
- T. gondii gi 237834513
- N. caninum Liverpool gi 401406932
- T. gondii gi 159024150
- C. owczaraki ATCC 30864 gi 514486732
- R. delenar gi 384490638
- D. fasciculatum gi 328898303
- G. theti 428184723
- P. palens gi 168045570
- B. distachyon gi 357136048
- O. sativa gi 27368857
- C. japonica gi 384080871
- C. arletinum gi 502078526
- C. roseus gi 110226562
- G. max LOC100801771
- V. vinifera gi 225483358
- R. communis gi 255557453
- R. norvegicus gi 25453370
- R. norvegicus gi 25453402
- Cricetulus spp. gi 191155
- M. ochrogaster gi 532030804
- M. musculus gi 6755046
- M. musculus gi 387427 PDB C3G5UB
- H. sapiens gi 42741659 PDB 6C0V
- G. gorilla gi 426356791
- P. troglodytes gi 114614226
- P. abelii gi 395738781
- C. aethiops gi 60326712
- M. mulatta gi 74136329
- M. fascicularis gi 544421742
- C. jacchus gi 296209780
- O. garnetti gi 395818915
- F. catus gi 283806558
- C. lupus familiaris gi 67462127
- A. melanoleuca gi 301756332
- O. divergens gi 472383372
- E. callubus gi 545214020
- S. scrofa gi 335295539
- O. orca gi 465971828
- O. aries gi 125629444
- B. taurus gi 528930244
- E. telfairi gi 507646369
- C. porcellus gi 523580052
- H. glaber gi 513001951
- O. degus gi 507639834
- C. lanigera gi 533188054
- M. domestica gi 334348853
- X. tropicalis gi 148234563
- D. rerio gi 326674864
- P. paniscus gi 397509337
- M. mulatta gi 355580770
- C. elegans gi 17541710 PDB 4F4C

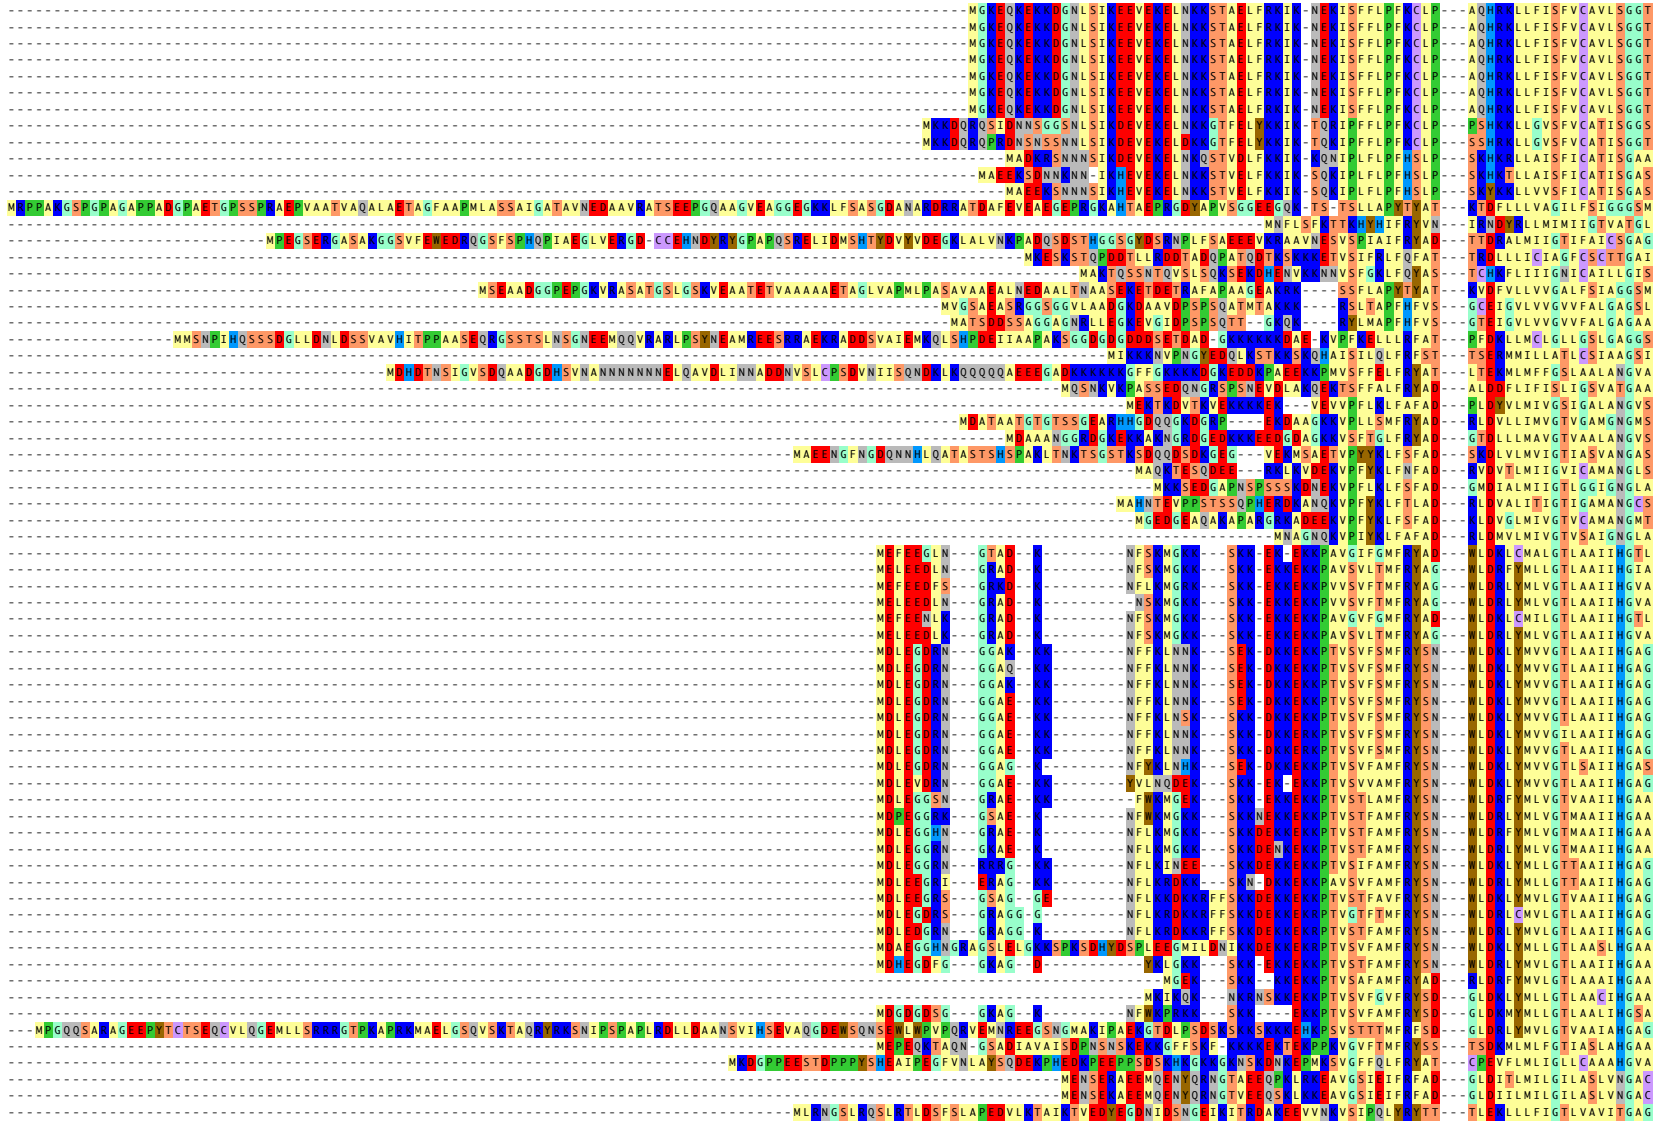



# TMD 4

# TMD 5

# TMD 6...

- P. falciparum NYSD PF3D7\_0523000
- P. falciparum NFSD
- P. falciparum YNSD
- P. falciparum FYSD
- P. falciparum YFSD
- P. falciparum FCDY
- P. falciparum 'inactive' NYSD
- P. knowlesi gi 221056887
- P. vivax gi 290564285
- P. chabaudi gi 2200636
- P. yoelii yoelii gi 83314634
- P. berghie anka gi 68076009
- N. caninum gi 401404748
- S. cerevisiae gi 6322640
- L. major Friedlin gi 157875614
- M. racemosus gi 13641444
- S. mansoni gi 425475
- T. gondii gi 237834513
- N. caninum Liverpool gi 401406932
- T. gondii gi 159024150
- C. owczarzak ATCC 30984 gi 514486732
- R. dilemar gi 384490636
- D. fasciculatum gi 328689303
- G. theta gi 428184723
- P. patens gi 168045570
- B. distachyon gi 357136048
- O. sativa gi 27386857
- C. japonica gi 384080871
- C. arletrium gi 502078526
- C. roseus gi 119226562
- G. max LOC100801771
- V. vinifera gi 225463598
- R. communis gi 25557453
- R. norvegicus gi 25453370
- R. norvegicus gi 25453402
- Cricetulus spp. gi 191155
- M. ochrogaster gi 532030804
- M. musculus gi 6755046
- M. musculus gi 387427 PDB C3G5UB
- H. sapiens gi 42741659 PDB 6C0V
- G. gorilla gi 426356791
- P. troglodytes gi 114614226
- P. abelii gi 395738781
- C. aethiops gi 60326712
- M. mulatta gi 74136329
- M. fascicularis gi 544421742
- C. jacchus gi 296209780
- O. garretti gi 395818915
- F. catus gi 283806558
- C. lupis familiaris gi 67462127
- A. melanoleuca gi 301756332
- O. divergens gi 472383372
- E. gallus gi 545214020
- S. crofa gi 33529539
- O. orca gi 465971828
- O. aries gi 125629444
- B. taurus gi 528930244
- E. telairi gi 507646369
- C. porcellus gi 523580052
- H. glaber gi 513001951
- O. degus gi 507639834
- C. lanigera gi 533185054
- M. domestica gi 334348853
- X. tropicalis gi 148234563
- D. rerio gi 326674864
- P. paniscus gi 397509337
- M. mulatta gi 355680770
- C. elegans gi 17541710 PDB 4F4C

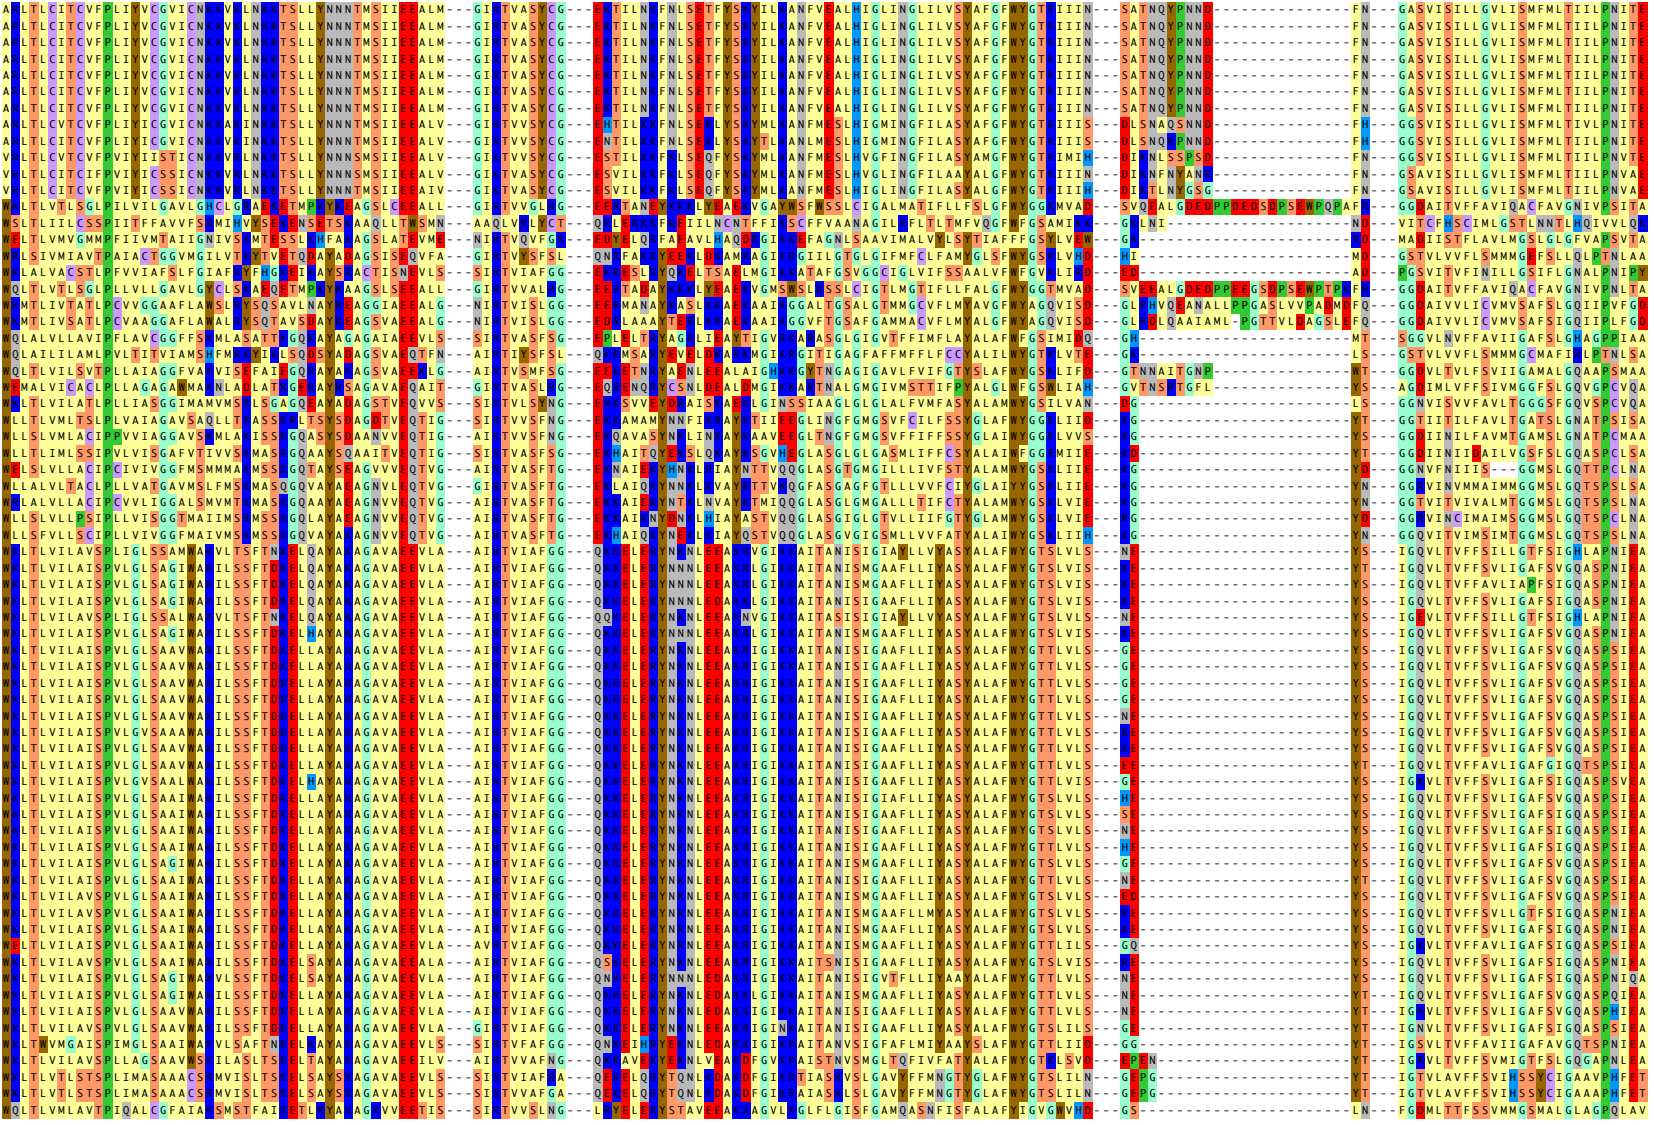

...TMD 6

NBD 1...

Walker A

Q-loop

- P. falciparum NYSND PF3D7\_0523000
- P. falciparum NYSDD
- P. falciparum YNSND
- P. falciparum FYNSD
- P. falciparum YFSND
- P. falciparum FCDY
- P. falciparum 'inactive' NYSND
- P. knowlesi gi 221056887
- P. vivax gi 290564285
- P. chabaudi gi 2200636
- P. yoelii yoelii gi 83314634
- P. berghel anka gi 68076009
- N. caninum gi 401404748
- S. cerevisiae gi 6322640
- M. racemosus gi 13641444
- L. major Friedlin gi 157875614
- VSSASAAAN IIFETI
- INGAVTASQIFAFI
- T. gondii gi 237834513
- N. caninum Liverpool gi 401406932
- T. gondii gi 159024160
- G. owczarzakii ATCC 30864 gi 514486732
- D. delamar gi 384490636
- R. fasciculatum gi 328869303
- G. theta gi 428184723
- P. patens gi 168045570
- B. distachyon gi 357136048
- O. sativa gi 27368857
- C. japonica gi 384080871
- C. arietinum gi 502078526
- C. roseus gi 110226562
- G. max LOC100801771
- V. vinifera gi 225463358
- R. communis gi 255557453
- R. norvegicus gi 25453370
- R. norvegicus gi 25453402
- Cricetulus spp. gi 191155
- M. ochrogaster gi 532030804
- M. musculus gi 6755046
- M. musculus gi 387427 PDB C3G5UB
- H. sapiens gi 42741659 PDB 6C0V
- G. gorilla gi 426356791
- P. troglodytes gi 114614226
- P. abelii gi 395738781
- C. aethiops gi 60326712
- M. mulatta gi 74136329
- M. fascicularis gi 544421742
- C. jacchus gi 296209780
- O. garrnetii gi 395818915
- F. catus gi 283806558
- C. lupus familiaris gi 67462127
- A. melanocephala gi 301756332
- O. diversus gi 47283372
- E. callibus gi 545214020
- S. scrofa gi 335295539
- O. orca gi 465971828
- O. arles gi 125629444
- B. taurus gi 528930244
- E. tefairi gi 507646369
- C. porcellus gi 523580052
- H. glaber gi 513001951
- O. degus gi 507639834
- C. lanigera gi 533185054
- M. domestica gi 334348853
- X. tropicalis gi 148234563
- D. rerio gi 326674864
- P. paniscus gi 397509337
- M. mulatta gi 355560770
- C. elegans gi 17541710 PDB 4F4C

|   |   |   |   |   |   |   |   |   |   |   |   |   |     |   |   |   |   |   |   |   |     |   |   |   |   |   |   |   |   |   |   |     |   |   |   |   |   |   |   |   |   |   |   |   |   |   |   |   |   |   |   |   |   |   |   |   |   |   |   |   |   |   |   |   |   |   |   |   |   |   |   |   |   |   |   |   |   |   |   |   |   |   |   |   |   |   |   |   |   |   |   |   |   |   |   |   |   |   |   |   |   |   |   |   |   |   |   |   |   |   |   |   |     |   |   |   |   |   |   |   |   |   |   |   |   |   |   |   |   |   |   |     |   |   |   |   |   |   |   |   |   |   |   |   |   |   |   |   |   |   |   |   |   |   |   |   |   |   |   |   |   |   |   |   |   |   |   |   |   |   |   |   |   |   |   |   |   |   |   |   |   |   |   |   |   |   |   |   |   |   |   |   |   |   |   |   |   |   |   |   |   |   |   |   |   |   |   |   |   |   |   |   |     |   |   |   |   |   |   |   |   |   |   |   |   |   |   |   |   |   |   |     |   |   |   |   |   |   |   |   |   |   |   |   |   |   |   |   |   |   |   |   |   |   |   |   |   |   |   |   |   |   |   |   |   |   |   |   |   |   |   |   |   |   |   |   |   |   |   |   |   |   |   |   |   |   |   |   |   |   |   |   |   |   |   |   |   |   |   |   |   |   |   |   |   |   |   |   |   |   |   |   |     |   |   |   |   |   |   |   |   |   |   |   |   |   |   |   |   |   |   |     |   |   |   |   |   |   |   |   |   |   |   |   |   |   |   |   |   |   |   |   |   |   |   |   |   |   |   |   |   |   |   |   |   |   |   |   |   |   |   |   |   |   |   |   |   |   |   |   |   |   |   |   |   |   |   |   |   |   |   |   |   |   |   |   |   |   |   |   |   |   |   |   |   |   |   |   |   |   |   |   |     |   |   |   |   |   |   |   |   |   |   |   |   |   |   |   |   |   |   |     |   |   |   |   |   |   |   |   |   |   |   |   |   |   |   |   |   |   |   |   |   |   |   |   |   |   |   |   |   |   |   |   |   |   |   |   |   |   |   |   |   |   |   |   |   |   |   |   |   |   |   |   |   |   |   |   |   |   |   |   |   |   |   |   |   |   |   |   |   |   |   |   |   |   |   |   |   |   |   |   |     |   |   |   |   |   |   |   |   |   |   |   |   |   |   |   |   |   |   |     |   |   |   |   |   |   |   |   |   |   |   |   |   |   |   |   |   |   |   |   |   |   |   |   |   |   |   |   |   |   |   |   |   |   |   |   |   |   |   |   |   |   |   |   |   |   |   |   |   |   |   |   |   |   |   |   |   |   |   |   |   |   |   |   |   |   |   |   |   |   |   |   |   |   |   |   |   |   |   |   |     |   |   |   |   |   |   |   |   |   |   |   |   |   |   |   |   |   |   |     |   |   |   |   |   |   |   |   |   |   |   |   |   |   |   |   |   |   |   |   |   |   |   |   |   |   |   |   |   |   |   |   |   |   |   |   |   |   |   |   |   |   |   |   |   |   |   |   |   |   |   |   |   |   |   |   |   |   |   |   |   |   |   |   |   |   |   |   |   |   |   |   |   |   |   |   |   |   |   |   |     |   |   |   |   |   |   |   |   |   |   |   |   |   |   |   |   |   |   |     |   |   |   |   |   |   |   |   |   |   |   |   |   |   |   |   |   |   |   |   |   |   |   |   |   |   |   |   |   |   |   |   |   |   |   |   |   |   |   |   |   |   |   |   |   |   |   |   |   |   |   |   |   |   |   |   |   |   |   |   |   |   |   |   |   |   |   |   |   |   |   |   |   |   |   |   |   |   |   |   |     |   |   |   |   |   |   |   |   |   |   |   |   |   |   |   |   |   |   |     |   |   |   |   |   |   |   |   |   |   |   |   |   |   |   |   |   |   |   |   |   |   |   |   |   |   |   |   |   |   |   |   |   |   |   |   |   |   |   |   |   |   |   |   |   |   |   |   |   |   |   |   |   |   |   |   |   |   |   |   |   |   |   |   |   |   |   |   |   |   |   |   |   |   |   |   |   |   |   |   |     |   |   |   |   |   |   |   |   |   |   |   |   |   |   |   |   |   |   |     |   |   |   |   |   |   |   |   |   |   |   |   |   |   |   |   |   |   |   |   |   |   |   |   |   |   |   |   |   |   |   |   |   |   |   |   |   |   |   |   |   |   |   |   |   |   |   |   |   |   |   |   |   |   |   |   |   |   |   |   |   |   |   |   |   |   |   |   |   |   |   |   |   |   |   |   |   |   |   |   |     |   |   |   |   |   |   |   |   |   |   |   |   |   |   |   |   |   |   |     |   |   |   |   |   |   |   |   |   |   |   |   |   |   |   |   |   |   |   |   |   |   |   |   |   |   |   |   |   |   |   |   |   |   |   |   |   |   |   |   |   |   |   |   |   |   |   |   |   |   |   |   |   |   |   |   |   |   |   |   |   |   |   |   |   |   |   |   |   |   |   |   |   |   |   |   |   |   |   |   |     |   |   |   |   |   |   |   |   |   |   |   |   |   |   |   |   |   |   |     |   |   |   |   |   |   |   |   |   |   |   |   |   |   |   |   |   |   |   |   |   |   |   |   |   |   |   |   |   |   |   |   |   |   |   |   |   |   |   |   |   |   |   |   |   |   |   |   |   |   |   |   |   |   |   |   |   |   |   |   |   |   |   |   |   |   |   |   |   |   |   |   |   |   |   |   |   |   |   |   |     |   |   |   |   |   |   |   |   |   |   |   |   |   |   |   |   |   |   |     |   |   |   |   |   |   |   |   |   |   |   |   |   |   |   |   |   |   |   |   |   |   |   |   |   |   |   |   |   |   |   |   |   |   |   |   |   |   |   |   |   |   |   |   |   |   |   |   |   |   |   |   |   |   |   |   |   |   |   |   |   |   |   |   |   |   |   |   |   |   |   |   |   |   |   |   |   |   |   |   |     |   |   |   |   |   |   |   |   |   |   |   |   |   |   |   |   |   |   |     |   |   |   |   |   |   |   |   |   |   |   |   |   |   |   |   |   |   |   |   |   |   |   |   |   |   |   |   |   |   |   |   |   |   |   |   |   |   |   |   |   |   |   |   |   |   |   |   |   |   |   |   |   |   |   |   |   |   |   |   |   |   |   |   |   |   |   |   |   |   |   |   |   |   |   |   |   |   |   |   |     |   |   |   |   |   |   |   |   |   |   |   |   |   |   |   |   |   |   |     |   |   |   |   |   |   |   |   |   |   |   |   |   |   |   |   |   |   |   |   |   |   |   |   |   |   |   |   |   |   |   |   |   |   |   |   |   |   |   |   |   |   |   |   |   |   |   |   |   |   |   |   |   |   |   |   |   |   |   |   |   |   |   |   |   |   |   |   |   |   |   |   |   |   |   |   |   |   |   |   |     |   |   |   |   |   |   |   |   |   |   |   |   |   |   |   |   |   |   |     |   |   |   |   |   |   |   |   |   |   |   |   |   |   |   |   |   |   |   |   |   |   |   |   |   |   |   |   |   |   |   |   |   |   |   |   |   |   |   |   |   |   |   |   |   |   |   |   |   |   |   |   |   |   |   |   |   |   |   |   |   |   |   |   |   |   |   |   |   |   |   |   |   |   |   |   |   |   |   |   |     |   |   |   |   |   |   |   |   |   |   |   |   |   |   |   |   |   |   |     |   |   |   |   |   |   |   |   |   |   |   |   |   |   |   |   |   |   |   |   |   |   |   |   |   |   |   |   |   |   |   |   |   |   |   |   |   |   |   |   |   |   |   |   |   |   |   |   |   |   |   |   |   |   |   |   |   |   |   |   |   |   |   |   |   |   |   |   |   |   |   |   |   |   |   |   |   |   |   |   |     |   |   |   |   |   |   |   |   |   |   |   |   |   |   |   |   |   |   |     |   |   |   |   |   |   |   |   |   |   |   |   |   |   |   |   |   |   |   |   |   |   |   |   |   |   |   |   |   |   |   |   |   |   |   |   |   |   |   |   |   |   |   |   |   |   |   |   |   |   |   |   |   |   |   |   |   |   |   |   |   |   |   |   |   |   |   |   |   |   |   |   |   |   |   |   |   |   |   |   |     |   |   |   |   |   |   |   |   |   |   |   |   |   |   |   |   |   |   |     |   |   |   |   |   |   |   |   |   |   |   |   |   |   |   |   |   |   |   |   |   |   |   |   |   |   |   |   |   |   |   |   |   |   |   |   |   |   |   |   |   |   |   |   |   |   |   |   |   |   |   |   |   |   |   |   |   |   |   |   |   |   |   |   |   |   |   |   |   |   |   |   |   |   |   |   |   |   |   |   |     |   |   |   |   |   |   |   |   |   |   |   |   |   |   |   |   |   |   |     |   |   |   |   |   |   |   |   |   |   |   |   |   |   |   |   |   |   |   |   |   |   |   |   |   |   |   |   |   |   |   |   |   |   |   |   |   |   |   |   |   |   |   |   |   |   |   |   |   |   |   |   |   |   |   |   |   |   |   |   |   |   |   |   |   |   |   |   |   |   |   |   |   |   |   |   |   |   |   |   |     |   |   |   |   |   |   |   |   |   |   |   |   |   |   |   |   |   |   |     |   |   |   |   |   |   |   |   |   |   |   |   |   |   |   |   |   |   |   |   |   |   |   |   |   |   |   |   |   |   |   |   |   |   |   |   |   |   |   |   |   |   |   |   |   |   |   |   |   |   |   |   |   |   |   |   |   |   |   |   |   |   |   |   |   |   |   |   |   |   |   |   |   |   |   |   |   |   |   |   |     |   |   |   |   |   |   |   |   |   |   |   |   |   |   |   |   |   |   |     |   |   |
|---|---|---|---|---|---|---|---|---|---|---|---|---|-----|---|---|---|---|---|---|---|-----|---|---|---|---|---|---|---|---|---|---|-----|---|---|---|---|---|---|---|---|---|---|---|---|---|---|---|---|---|---|---|---|---|---|---|---|---|---|---|---|---|---|---|---|---|---|---|---|---|---|---|---|---|---|---|---|---|---|---|---|---|---|---|---|---|---|---|---|---|---|---|---|---|---|---|---|---|---|---|---|---|---|---|---|---|---|---|---|---|---|---|---|-----|---|---|---|---|---|---|---|---|---|---|---|---|---|---|---|---|---|---|-----|---|---|---|---|---|---|---|---|---|---|---|---|---|---|---|---|---|---|---|---|---|---|---|---|---|---|---|---|---|---|---|---|---|---|---|---|---|---|---|---|---|---|---|---|---|---|---|---|---|---|---|---|---|---|---|---|---|---|---|---|---|---|---|---|---|---|---|---|---|---|---|---|---|---|---|---|---|---|---|---|-----|---|---|---|---|---|---|---|---|---|---|---|---|---|---|---|---|---|---|-----|---|---|---|---|---|---|---|---|---|---|---|---|---|---|---|---|---|---|---|---|---|---|---|---|---|---|---|---|---|---|---|---|---|---|---|---|---|---|---|---|---|---|---|---|---|---|---|---|---|---|---|---|---|---|---|---|---|---|---|---|---|---|---|---|---|---|---|---|---|---|---|---|---|---|---|---|---|---|---|---|-----|---|---|---|---|---|---|---|---|---|---|---|---|---|---|---|---|---|---|-----|---|---|---|---|---|---|---|---|---|---|---|---|---|---|---|---|---|---|---|---|---|---|---|---|---|---|---|---|---|---|---|---|---|---|---|---|---|---|---|---|---|---|---|---|---|---|---|---|---|---|---|---|---|---|---|---|---|---|---|---|---|---|---|---|---|---|---|---|---|---|---|---|---|---|---|---|---|---|---|---|-----|---|---|---|---|---|---|---|---|---|---|---|---|---|---|---|---|---|---|-----|---|---|---|---|---|---|---|---|---|---|---|---|---|---|---|---|---|---|---|---|---|---|---|---|---|---|---|---|---|---|---|---|---|---|---|---|---|---|---|---|---|---|---|---|---|---|---|---|---|---|---|---|---|---|---|---|---|---|---|---|---|---|---|---|---|---|---|---|---|---|---|---|---|---|---|---|---|---|---|---|-----|---|---|---|---|---|---|---|---|---|---|---|---|---|---|---|---|---|---|-----|---|---|---|---|---|---|---|---|---|---|---|---|---|---|---|---|---|---|---|---|---|---|---|---|---|---|---|---|---|---|---|---|---|---|---|---|---|---|---|---|---|---|---|---|---|---|---|---|---|---|---|---|---|---|---|---|---|---|---|---|---|---|---|---|---|---|---|---|---|---|---|---|---|---|---|---|---|---|---|---|-----|---|---|---|---|---|---|---|---|---|---|---|---|---|---|---|---|---|---|-----|---|---|---|---|---|---|---|---|---|---|---|---|---|---|---|---|---|---|---|---|---|---|---|---|---|---|---|---|---|---|---|---|---|---|---|---|---|---|---|---|---|---|---|---|---|---|---|---|---|---|---|---|---|---|---|---|---|---|---|---|---|---|---|---|---|---|---|---|---|---|---|---|---|---|---|---|---|---|---|---|-----|---|---|---|---|---|---|---|---|---|---|---|---|---|---|---|---|---|---|-----|---|---|---|---|---|---|---|---|---|---|---|---|---|---|---|---|---|---|---|---|---|---|---|---|---|---|---|---|---|---|---|---|---|---|---|---|---|---|---|---|---|---|---|---|---|---|---|---|---|---|---|---|---|---|---|---|---|---|---|---|---|---|---|---|---|---|---|---|---|---|---|---|---|---|---|---|---|---|---|---|-----|---|---|---|---|---|---|---|---|---|---|---|---|---|---|---|---|---|---|-----|---|---|---|---|---|---|---|---|---|---|---|---|---|---|---|---|---|---|---|---|---|---|---|---|---|---|---|---|---|---|---|---|---|---|---|---|---|---|---|---|---|---|---|---|---|---|---|---|---|---|---|---|---|---|---|---|---|---|---|---|---|---|---|---|---|---|---|---|---|---|---|---|---|---|---|---|---|---|---|---|-----|---|---|---|---|---|---|---|---|---|---|---|---|---|---|---|---|---|---|-----|---|---|---|---|---|---|---|---|---|---|---|---|---|---|---|---|---|---|---|---|---|---|---|---|---|---|---|---|---|---|---|---|---|---|---|---|---|---|---|---|---|---|---|---|---|---|---|---|---|---|---|---|---|---|---|---|---|---|---|---|---|---|---|---|---|---|---|---|---|---|---|---|---|---|---|---|---|---|---|---|-----|---|---|---|---|---|---|---|---|---|---|---|---|---|---|---|---|---|---|-----|---|---|---|---|---|---|---|---|---|---|---|---|---|---|---|---|---|---|---|---|---|---|---|---|---|---|---|---|---|---|---|---|---|---|---|---|---|---|---|---|---|---|---|---|---|---|---|---|---|---|---|---|---|---|---|---|---|---|---|---|---|---|---|---|---|---|---|---|---|---|---|---|---|---|---|---|---|---|---|---|-----|---|---|---|---|---|---|---|---|---|---|---|---|---|---|---|---|---|---|-----|---|---|---|---|---|---|---|---|---|---|---|---|---|---|---|---|---|---|---|---|---|---|---|---|---|---|---|---|---|---|---|---|---|---|---|---|---|---|---|---|---|---|---|---|---|---|---|---|---|---|---|---|---|---|---|---|---|---|---|---|---|---|---|---|---|---|---|---|---|---|---|---|---|---|---|---|---|---|---|---|-----|---|---|---|---|---|---|---|---|---|---|---|---|---|---|---|---|---|---|-----|---|---|---|---|---|---|---|---|---|---|---|---|---|---|---|---|---|---|---|---|---|---|---|---|---|---|---|---|---|---|---|---|---|---|---|---|---|---|---|---|---|---|---|---|---|---|---|---|---|---|---|---|---|---|---|---|---|---|---|---|---|---|---|---|---|---|---|---|---|---|---|---|---|---|---|---|---|---|---|---|-----|---|---|---|---|---|---|---|---|---|---|---|---|---|---|---|---|---|---|-----|---|---|---|---|---|---|---|---|---|---|---|---|---|---|---|---|---|---|---|---|---|---|---|---|---|---|---|---|---|---|---|---|---|---|---|---|---|---|---|---|---|---|---|---|---|---|---|---|---|---|---|---|---|---|---|---|---|---|---|---|---|---|---|---|---|---|---|---|---|---|---|---|---|---|---|---|---|---|---|---|-----|---|---|---|---|---|---|---|---|---|---|---|---|---|---|---|---|---|---|-----|---|---|---|---|---|---|---|---|---|---|---|---|---|---|---|---|---|---|---|---|---|---|---|---|---|---|---|---|---|---|---|---|---|---|---|---|---|---|---|---|---|---|---|---|---|---|---|---|---|---|---|---|---|---|---|---|---|---|---|---|---|---|---|---|---|---|---|---|---|---|---|---|---|---|---|---|---|---|---|---|-----|---|---|---|---|---|---|---|---|---|---|---|---|---|---|---|---|---|---|-----|---|---|---|---|---|---|---|---|---|---|---|---|---|---|---|---|---|---|---|---|---|---|---|---|---|---|---|---|---|---|---|---|---|---|---|---|---|---|---|---|---|---|---|---|---|---|---|---|---|---|---|---|---|---|---|---|---|---|---|---|---|---|---|---|---|---|---|---|---|---|---|---|---|---|---|---|---|---|---|---|-----|---|---|---|---|---|---|---|---|---|---|---|---|---|---|---|---|---|---|-----|---|---|---|---|---|---|---|---|---|---|---|---|---|---|---|---|---|---|---|---|---|---|---|---|---|---|---|---|---|---|---|---|---|---|---|---|---|---|---|---|---|---|---|---|---|---|---|---|---|---|---|---|---|---|---|---|---|---|---|---|---|---|---|---|---|---|---|---|---|---|---|---|---|---|---|---|---|---|---|---|-----|---|---|---|---|---|---|---|---|---|---|---|---|---|---|---|---|---|---|-----|---|---|---|---|---|---|---|---|---|---|---|---|---|---|---|---|---|---|---|---|---|---|---|---|---|---|---|---|---|---|---|---|---|---|---|---|---|---|---|---|---|---|---|---|---|---|---|---|---|---|---|---|---|---|---|---|---|---|---|---|---|---|---|---|---|---|---|---|---|---|---|---|---|---|---|---|---|---|---|---|-----|---|---|---|---|---|---|---|---|---|---|---|---|---|---|---|---|---|---|-----|---|---|---|---|---|---|---|---|---|---|---|---|---|---|---|---|---|---|---|---|---|---|---|---|---|---|---|---|---|---|---|---|---|---|---|---|---|---|---|---|---|---|---|---|---|---|---|---|---|---|---|---|---|---|---|---|---|---|---|---|---|---|---|---|---|---|---|---|---|---|---|---|---|---|---|---|---|---|---|---|-----|---|---|---|---|---|---|---|---|---|---|---|---|---|---|---|---|---|---|-----|---|---|---|---|---|---|---|---|---|---|---|---|---|---|---|---|---|---|---|---|---|---|---|---|---|---|---|---|---|---|---|---|---|---|---|---|---|---|---|---|---|---|---|---|---|---|---|---|---|---|---|---|---|---|---|---|---|---|---|---|---|---|---|---|---|---|---|---|---|---|---|---|---|---|---|---|---|---|---|---|-----|---|---|---|---|---|---|---|---|---|---|---|---|---|---|---|---|---|---|-----|---|---|---|---|---|---|---|---|---|---|---|---|---|---|---|---|---|---|---|---|---|---|---|---|---|---|---|---|---|---|---|---|---|---|---|---|---|---|---|---|---|---|---|---|---|---|---|---|---|---|---|---|---|---|---|---|---|---|---|---|---|---|---|---|---|---|---|---|---|---|---|---|---|---|---|---|---|---|---|---|-----|---|---|---|---|---|---|---|---|---|---|---|---|---|---|---|---|---|---|-----|---|---|
| Y | M | A | L | E | A | T | A | N | S | L | E | I | --- | I | N | K | P | L | V | E | --- | N | N | D | G | E | T | L | P | N | I | --- | I | F | N | V | F | H | Y | D | T | R | K | D | V | E | I | N | L | S | F | T | L | G | T | A | F | V | G | S | G | G | S | T | I | L | L | I | L | L | P | T | G | I | I | V | N | S | H | N | L | D | I | N | L | N | S | I | G | V | V | S | O | P | L | F | S | N | S | I | N | N | I | Y | S | L | S | L | O | L | A | M | --- | N | Y | E | E | N | T | N | D | T | Y | E | N | N | F | S | L | I | S | --- | I | F | N | V | F | H | Y | D | T | R | K | D | V | E | I | N | L | S | F | T | L | G | T | A | F | V | G | S | G | G | S | T | I | L | L | I | L | L | P | T | G | I | I | V | N | S | H | N | L | D | I | N | L | N | S | I | G | V | V | S | O | P | L | F | S | N | S | I | N | N | I | Y | S | L | S | L | O | L | A | M | --- | N | Y | E | E | N | T | N | D | T | Y | E | N | N | F | S | L | I | S | --- | I | F | N | V | F | H | Y | D | T | R | K | D | V | E | I | N | L | S | F | T | L | G | T | A | F | V | G | S | G | G | S | T | I | L | L | I | L | L | P | T | G | I | I | V | N | S | H | N | L | D | I | N | L | N | S | I | G | V | V | S | O | P | L | F | S | N | S | I | N | N | I | Y | S | L | S | L | O | L | A | M | --- | N | Y | E | E | N | T | N | D | T | Y | E | N | N | F | S | L | I | S | --- | I | F | N | V | F | H | Y | D | T | R | K | D | V | E | I | N | L | S | F | T | L | G | T | A | F | V | G | S | G | G | S | T | I | L | L | I | L | L | P | T | G | I | I | V | N | S | H | N | L | D | I | N | L | N | S | I | G | V | V | S | O | P | L | F | S | N | S | I | N | N | I | Y | S | L | S | L | O | L | A | M | --- | N | Y | E | E | N | T | N | D | T | Y | E | N | N | F | S | L | I | S | --- | I | F | N | V | F | H | Y | D | T | R | K | D | V | E | I | N | L | S | F | T | L | G | T | A | F | V | G | S | G | G | S | T | I | L | L | I | L | L | P | T | G | I | I | V | N | S | H | N | L | D | I | N | L | N | S | I | G | V | V | S | O | P | L | F | S | N | S | I | N | N | I | Y | S | L | S | L | O | L | A | M | --- | N | Y | E | E | N | T | N | D | T | Y | E | N | N | F | S | L | I | S | --- | I | F | N | V | F | H | Y | D | T | R | K | D | V | E | I | N | L | S | F | T | L | G | T | A | F | V | G | S | G | G | S | T | I | L | L | I | L | L | P | T | G | I | I | V | N | S | H | N | L | D | I | N | L | N | S | I | G | V | V | S | O | P | L | F | S | N | S | I | N | N | I | Y | S | L | S | L | O | L | A | M | --- | N | Y | E | E | N | T | N | D | T | Y | E | N | N | F | S | L | I | S | --- | I | F | N | V | F | H | Y | D | T | R | K | D | V | E | I | N | L | S | F | T | L | G | T | A | F | V | G | S | G | G | S | T | I | L | L | I | L | L | P | T | G | I | I | V | N | S | H | N | L | D | I | N | L | N | S | I | G | V | V | S | O | P | L | F | S | N | S | I | N | N | I | Y | S | L | S | L | O | L | A | M | --- | N | Y | E | E | N | T | N | D | T | Y | E | N | N | F | S | L | I | S | --- | I | F | N | V | F | H | Y | D | T | R | K | D | V | E | I | N | L | S | F | T | L | G | T | A | F | V | G | S | G | G | S | T | I | L | L | I | L | L | P | T | G | I | I | V | N | S | H | N | L | D | I | N | L | N | S | I | G | V | V | S | O | P | L | F | S | N | S | I | N | N | I | Y | S | L | S | L | O | L | A | M | --- | N | Y | E | E | N | T | N | D | T | Y | E | N | N | F | S | L | I | S | --- | I | F | N | V | F | H | Y | D | T | R | K | D | V | E | I | N | L | S | F | T | L | G | T | A | F | V | G | S | G | G | S | T | I | L | L | I | L | L | P | T | G | I | I | V | N | S | H | N | L | D | I | N | L | N | S | I | G | V | V | S | O | P | L | F | S | N | S | I | N | N | I | Y | S | L | S | L | O | L | A | M | --- | N | Y | E | E | N | T | N | D | T | Y | E | N | N | F | S | L | I | S | --- | I | F | N | V | F | H | Y | D | T | R | K | D | V | E | I | N | L | S | F | T | L | G | T | A | F | V | G | S | G | G | S | T | I | L | L | I | L | L | P | T | G | I | I | V | N | S | H | N | L | D | I | N | L | N | S | I | G | V | V | S | O | P | L | F | S | N | S | I | N | N | I | Y | S | L | S | L | O | L | A | M | --- | N | Y | E | E | N | T | N | D | T | Y | E | N | N | F | S | L | I | S | --- | I | F | N | V | F | H | Y | D | T | R | K | D | V | E | I | N | L | S | F | T | L | G | T | A | F | V | G | S | G | G | S | T | I | L | L | I | L | L | P | T | G | I | I | V | N | S | H | N | L | D | I | N | L | N | S | I | G | V | V | S | O | P | L | F | S | N | S | I | N | N | I | Y | S | L | S | L | O | L | A | M | --- | N | Y | E | E | N | T | N | D | T | Y | E | N | N | F | S | L | I | S | --- | I | F | N | V | F | H | Y | D | T | R | K | D | V | E | I | N | L | S | F | T | L | G | T | A | F | V | G | S | G | G | S | T | I | L | L | I | L | L | P | T | G | I | I | V | N | S | H | N | L | D | I | N | L | N | S | I | G | V | V | S | O | P | L | F | S | N | S | I | N | N | I | Y | S | L | S | L | O | L | A | M | --- | N | Y | E | E | N | T | N | D | T | Y | E | N | N | F | S | L | I | S | --- | I | F | N | V | F | H | Y | D | T | R | K | D | V | E | I | N | L | S | F | T | L | G | T | A | F | V | G | S | G | G | S | T | I | L | L | I | L | L | P | T | G | I | I | V | N | S | H | N | L | D | I | N | L | N | S | I | G | V | V | S | O | P | L | F | S | N | S | I | N | N | I | Y | S | L | S | L | O | L | A | M | --- | N | Y | E | E | N | T | N | D | T | Y | E | N | N | F | S | L | I | S | --- | I | F | N | V | F | H | Y | D | T | R | K | D | V | E | I | N | L | S | F | T | L | G | T | A | F | V | G | S | G | G | S | T | I | L | L | I | L | L | P | T | G | I | I | V | N | S | H | N | L | D | I | N | L | N | S | I | G | V | V | S | O | P | L | F | S | N | S | I | N | N | I | Y | S | L | S | L | O | L | A | M | --- | N | Y | E | E | N | T | N | D | T | Y | E | N | N | F | S | L | I | S | --- | I | F | N | V | F | H | Y | D | T | R | K | D | V | E | I | N | L | S | F | T | L | G | T | A | F | V | G | S | G | G | S | T | I | L | L | I | L | L | P | T | G | I | I | V | N | S | H | N | L | D | I | N | L | N | S | I | G | V | V | S | O | P | L | F | S | N | S | I | N | N | I | Y | S | L | S | L | O | L | A | M | --- | N | Y | E | E | N | T | N | D | T | Y | E | N | N | F | S | L | I | S | --- | I | F | N | V | F | H | Y | D | T | R | K | D | V | E | I | N | L | S | F | T | L | G | T | A | F | V | G | S | G | G | S | T | I | L | L | I | L | L | P | T | G | I | I | V | N | S | H | N | L | D | I | N | L | N | S | I | G | V | V | S | O | P | L | F | S | N | S | I | N | N | I | Y | S | L | S | L | O | L | A | M | --- | N | Y | E | E | N | T | N | D | T | Y | E | N | N | F | S | L | I | S | --- | I | F | N | V | F | H | Y | D | T | R | K | D | V | E | I | N | L | S | F | T | L | G | T | A | F | V | G | S | G | G | S | T | I | L | L | I | L | L | P | T | G | I | I | V | N | S | H | N | L | D | I | N | L | N | S | I | G | V | V | S | O | P | L | F | S | N | S | I | N | N | I | Y | S | L | S | L | O | L | A | M | --- | N | Y | E | E | N | T | N | D | T | Y | E | N | N | F | S | L | I | S | --- | I | F | N | V | F | H | Y | D | T | R | K | D | V | E | I | N | L | S | F | T | L | G | T | A | F | V | G | S | G | G | S | T | I | L | L | I | L | L | P | T | G | I | I | V | N | S | H | N | L | D | I | N | L | N | S | I | G | V | V | S | O | P | L | F | S | N | S | I | N | N | I | Y | S | L | S | L | O | L | A | M | --- | N | Y | E | E | N | T | N | D | T | Y | E | N | N | F | S | L | I | S | --- | I | F | N | V | F | H | Y | D | T | R | K | D | V | E | I | N | L | S | F | T | L | G | T | A | F | V | G | S | G | G | S | T | I | L | L | I | L | L | P | T | G | I | I | V | N | S | H | N | L | D | I | N | L | N | S | I | G | V | V | S | O | P | L | F | S | N | S | I | N | N | I | Y | S | L | S | L | O | L | A | M | --- | N | Y | E | E | N | T | N | D | T | Y | E | N | N | F | S | L | I | S | --- | I | F | N | V | F | H | Y | D | T | R | K | D | V | E | I | N | L | S | F | T | L | G | T | A | F | V | G | S | G | G | S | T | I | L | L | I | L | L | P | T | G | I | I | V | N | S | H | N | L | D | I | N | L | N | S | I | G | V | V | S | O | P | L | F | S | N | S | I | N | N | I | Y | S | L | S | L | O | L | A | M | --- | N | Y | E | E | N | T | N | D | T | Y | E | N | N | F | S | L | I | S | --- | I | F | N | V | F | H | Y | D | T | R | K | D | V | E | I | N | L | S | F | T | L | G | T | A | F | V | G | S | G | G | S | T | I | L | L | I | L | L | P | T | G | I | I | V | N | S | H | N | L | D | I | N | L | N | S | I | G | V | V | S | O | P | L | F | S | N | S | I | N | N | I | Y | S | L | S | L | O | L | A | M | --- | N | Y | E | E | N | T | N | D | T | Y | E | N | N | F | S | L | I | S | --- | I | F |
|---|---|---|---|---|---|---|---|---|---|---|---|---|-----|---|---|---|---|---|---|---|-----|---|---|---|---|---|---|---|---|---|---|-----|---|---|---|---|---|---|---|---|---|---|---|---|---|---|---|---|---|---|---|---|---|---|---|---|---|---|---|---|---|---|---|---|---|---|---|---|---|---|---|---|---|---|---|---|---|---|---|---|---|---|---|---|---|---|---|---|---|---|---|---|---|---|---|---|---|---|---|---|---|---|---|---|---|---|---|---|---|---|---|---|-----|---|---|---|---|---|---|---|---|---|---|---|---|---|---|---|---|---|---|-----|---|---|---|---|---|---|---|---|---|---|---|---|---|---|---|---|---|---|---|---|---|---|---|---|---|---|---|---|---|---|---|---|---|---|---|---|---|---|---|---|---|---|---|---|---|---|---|---|---|---|---|---|---|---|---|---|---|---|---|---|---|---|---|---|---|---|---|---|---|---|---|---|---|---|---|---|---|---|---|---|-----|---|---|---|---|---|---|---|---|---|---|---|---|---|---|---|---|---|---|-----|---|---|---|---|---|---|---|---|---|---|---|---|---|---|---|---|---|---|---|---|---|---|---|---|---|---|---|---|---|---|---|---|---|---|---|---|---|---|---|---|---|---|---|---|---|---|---|---|---|---|---|---|---|---|---|---|---|---|---|---|---|---|---|---|---|---|---|---|---|---|---|---|---|---|---|---|---|---|---|---|-----|---|---|---|---|---|---|---|---|---|---|---|---|---|---|---|---|---|---|-----|---|---|---|---|---|---|---|---|---|---|---|---|---|---|---|---|---|---|---|---|---|---|---|---|---|---|---|---|---|---|---|---|---|---|---|---|---|---|---|---|---|---|---|---|---|---|---|---|---|---|---|---|---|---|---|---|---|---|---|---|---|---|---|---|---|---|---|---|---|---|---|---|---|---|---|---|---|---|---|---|-----|---|---|---|---|---|---|---|---|---|---|---|---|---|---|---|---|---|---|-----|---|---|---|---|---|---|---|---|---|---|---|---|---|---|---|---|---|---|---|---|---|---|---|---|---|---|---|---|---|---|---|---|---|---|---|---|---|---|---|---|---|---|---|---|---|---|---|---|---|---|---|---|---|---|---|---|---|---|---|---|---|---|---|---|---|---|---|---|---|---|---|---|---|---|---|---|---|---|---|---|-----|---|---|---|---|---|---|---|---|---|---|---|---|---|---|---|---|---|---|-----|---|---|---|---|---|---|---|---|---|---|---|---|---|---|---|---|---|---|---|---|---|---|---|---|---|---|---|---|---|---|---|---|---|---|---|---|---|---|---|---|---|---|---|---|---|---|---|---|---|---|---|---|---|---|---|---|---|---|---|---|---|---|---|---|---|---|---|---|---|---|---|---|---|---|---|---|---|---|---|---|-----|---|---|---|---|---|---|---|---|---|---|---|---|---|---|---|---|---|---|-----|---|---|---|---|---|---|---|---|---|---|---|---|---|---|---|---|---|---|---|---|---|---|---|---|---|---|---|---|---|---|---|---|---|---|---|---|---|---|---|---|---|---|---|---|---|---|---|---|---|---|---|---|---|---|---|---|---|---|---|---|---|---|---|---|---|---|---|---|---|---|---|---|---|---|---|---|---|---|---|---|-----|---|---|---|---|---|---|---|---|---|---|---|---|---|---|---|---|---|---|-----|---|---|---|---|---|---|---|---|---|---|---|---|---|---|---|---|---|---|---|---|---|---|---|---|---|---|---|---|---|---|---|---|---|---|---|---|---|---|---|---|---|---|---|---|---|---|---|---|---|---|---|---|---|---|---|---|---|---|---|---|---|---|---|---|---|---|---|---|---|---|---|---|---|---|---|---|---|---|---|---|-----|---|---|---|---|---|---|---|---|---|---|---|---|---|---|---|---|---|---|-----|---|---|---|---|---|---|---|---|---|---|---|---|---|---|---|---|---|---|---|---|---|---|---|---|---|---|---|---|---|---|---|---|---|---|---|---|---|---|---|---|---|---|---|---|---|---|---|---|---|---|---|---|---|---|---|---|---|---|---|---|---|---|---|---|---|---|---|---|---|---|---|---|---|---|---|---|---|---|---|---|-----|---|---|---|---|---|---|---|---|---|---|---|---|---|---|---|---|---|---|-----|---|---|---|---|---|---|---|---|---|---|---|---|---|---|---|---|---|---|---|---|---|---|---|---|---|---|---|---|---|---|---|---|---|---|---|---|---|---|---|---|---|---|---|---|---|---|---|---|---|---|---|---|---|---|---|---|---|---|---|---|---|---|---|---|---|---|---|---|---|---|---|---|---|---|---|---|---|---|---|---|-----|---|---|---|---|---|---|---|---|---|---|---|---|---|---|---|---|---|---|-----|---|---|---|---|---|---|---|---|---|---|---|---|---|---|---|---|---|---|---|---|---|---|---|---|---|---|---|---|---|---|---|---|---|---|---|---|---|---|---|---|---|---|---|---|---|---|---|---|---|---|---|---|---|---|---|---|---|---|---|---|---|---|---|---|---|---|---|---|---|---|---|---|---|---|---|---|---|---|---|---|-----|---|---|---|---|---|---|---|---|---|---|---|---|---|---|---|---|---|---|-----|---|---|---|---|---|---|---|---|---|---|---|---|---|---|---|---|---|---|---|---|---|---|---|---|---|---|---|---|---|---|---|---|---|---|---|---|---|---|---|---|---|---|---|---|---|---|---|---|---|---|---|---|---|---|---|---|---|---|---|---|---|---|---|---|---|---|---|---|---|---|---|---|---|---|---|---|---|---|---|---|-----|---|---|---|---|---|---|---|---|---|---|---|---|---|---|---|---|---|---|-----|---|---|---|---|---|---|---|---|---|---|---|---|---|---|---|---|---|---|---|---|---|---|---|---|---|---|---|---|---|---|---|---|---|---|---|---|---|---|---|---|---|---|---|---|---|---|---|---|---|---|---|---|---|---|---|---|---|---|---|---|---|---|---|---|---|---|---|---|---|---|---|---|---|---|---|---|---|---|---|---|-----|---|---|---|---|---|---|---|---|---|---|---|---|---|---|---|---|---|---|-----|---|---|---|---|---|---|---|---|---|---|---|---|---|---|---|---|---|---|---|---|---|---|---|---|---|---|---|---|---|---|---|---|---|---|---|---|---|---|---|---|---|---|---|---|---|---|---|---|---|---|---|---|---|---|---|---|---|---|---|---|---|---|---|---|---|---|---|---|---|---|---|---|---|---|---|---|---|---|---|---|-----|---|---|---|---|---|---|---|---|---|---|---|---|---|---|---|---|---|---|-----|---|---|---|---|---|---|---|---|---|---|---|---|---|---|---|---|---|---|---|---|---|---|---|---|---|---|---|---|---|---|---|---|---|---|---|---|---|---|---|---|---|---|---|---|---|---|---|---|---|---|---|---|---|---|---|---|---|---|---|---|---|---|---|---|---|---|---|---|---|---|---|---|---|---|---|---|---|---|---|---|-----|---|---|---|---|---|---|---|---|---|---|---|---|---|---|---|---|---|---|-----|---|---|---|---|---|---|---|---|---|---|---|---|---|---|---|---|---|---|---|---|---|---|---|---|---|---|---|---|---|---|---|---|---|---|---|---|---|---|---|---|---|---|---|---|---|---|---|---|---|---|---|---|---|---|---|---|---|---|---|---|---|---|---|---|---|---|---|---|---|---|---|---|---|---|---|---|---|---|---|---|-----|---|---|---|---|---|---|---|---|---|---|---|---|---|---|---|---|---|---|-----|---|---|---|---|---|---|---|---|---|---|---|---|---|---|---|---|---|---|---|---|---|---|---|---|---|---|---|---|---|---|---|---|---|---|---|---|---|---|---|---|---|---|---|---|---|---|---|---|---|---|---|---|---|---|---|---|---|---|---|---|---|---|---|---|---|---|---|---|---|---|---|---|---|---|---|---|---|---|---|---|-----|---|---|---|---|---|---|---|---|---|---|---|---|---|---|---|---|---|---|-----|---|---|---|---|---|---|---|---|---|---|---|---|---|---|---|---|---|---|---|---|---|---|---|---|---|---|---|---|---|---|---|---|---|---|---|---|---|---|---|---|---|---|---|---|---|---|---|---|---|---|---|---|---|---|---|---|---|---|---|---|---|---|---|---|---|---|---|---|---|---|---|---|---|---|---|---|---|---|---|---|-----|---|---|---|---|---|---|---|---|---|---|---|---|---|---|---|---|---|---|-----|---|---|---|---|---|---|---|---|---|---|---|---|---|---|---|---|---|---|---|---|---|---|---|---|---|---|---|---|---|---|---|---|---|---|---|---|---|---|---|---|---|---|---|---|---|---|---|---|---|---|---|---|---|---|---|---|---|---|---|---|---|---|---|---|---|---|---|---|---|---|---|---|---|---|---|---|---|---|---|---|-----|---|---|---|---|---|---|---|---|---|---|---|---|---|---|---|---|---|---|-----|---|---|---|---|---|---|---|---|---|---|---|---|---|---|---|---|---|---|---|---|---|---|---|---|---|---|---|---|---|---|---|---|---|---|---|---|---|---|---|---|---|---|---|---|---|---|---|---|---|---|---|---|---|---|---|---|---|---|---|---|---|---|---|---|---|---|---|---|---|---|---|---|---|---|---|---|---|---|---|---|-----|---|---|---|---|---|---|---|---|---|---|---|---|---|---|---|---|---|---|-----|---|---|---|---|---|---|---|---|---|---|---|---|---|---|---|---|---|---|---|---|---|---|---|---|---|---|---|---|---|---|---|---|---|---|---|---|---|---|---|---|---|---|---|---|---|---|---|---|---|---|---|---|---|---|---|---|---|---|---|---|---|---|---|---|---|---|---|---|---|---|---|---|---|---|---|---|---|---|---|---|-----|---|---|---|---|---|---|---|---|---|---|---|---|---|---|---|---|---|---|-----|---|---|

...NBD 1...

ABC signature

Walker B

- P. falciparum NYSND PF3D7\_0523000
- P. falciparum NYSND
- P. falciparum YNSND
- P. falciparum FYSND
- P. falciparum YNSND
- P. falciparum FYSND
- P. falciparum 'inactive' NYSND
- P. knowlesi gi 221056887
- P. vivax gi 290564285
- P. chabaudi gi 2200636
- P. yoelii yoelii gi 8314634
- P. berghel anka gi 68076009
- N. caninum gi 401404748
- S. cerevisiae gi 6322640
- M. racemosus gi 13641444
- L. major Friedlin gi 157875614
- S. mansoni gi 425475
- T. gondii gi 237834513
- N. caninum Liverpool gi 401406932
- T. gondii gi 159024160
- C. owczarzakii ATCC 30864 gi 514486732
- R. dellemar gi 384490636
- D. fasciculatum gi 328869303
- G. theta gi 428184723
- P. patens gi 168045570
- B. distachyon gi 357136048
- O. sativa gi 27368857
- C. japonica gi 384080871
- C. arietinum gi 502078526
- C. roseus gi 110226562
- G. max LOC100801771
- V. vinifera gi 225463358
- R. communis gi 255557453
- R. norvegicus gi 25453370
- R. norvegicus gi 25453402
- Cricetulus spp. gi 191155
- M. ochrogaster gi 532030804
- M. musculus gi 6755046
- M. musculus gi 387427 PDB C3GSUB
- H. sapiens gi 42741659 PDB 6C0V
- G. gorilla gi 426356791
- P. troglodytes gi 114614226
- P. abelii gi 395738781
- C. aethiops gi 60326712
- M. mulatta gi 74136329
- M. fascicularis gi 544421742
- C. jacchus gi 296209780
- O. garretti gi 395818915
- F. catus gi 283806558
- C. lupis familiaris gi 67462127
- A. melanoleuca gi 301756332
- O. divergens gi 472383372
- E. callubus gi 545214030
- S. scrofa gi 335295539
- O. orca gi 465971828
- O. aries gi 125629444
- B. taurus gi 528930244
- E. tefaliri gi 507646369
- C. porcellus gi 523580052
- G. glaber gi 513001951
- O. degus gi 507639834
- C. lanigera gi 533185054
- M. domestica gi 334348653
- X. tropicalis gi 148234563
- D. rerio gi 326674864
- P. paniscus gi 397509337
- M. mulatta gi 355560770
- C. elegans gi 17541710 PDB 4F4C

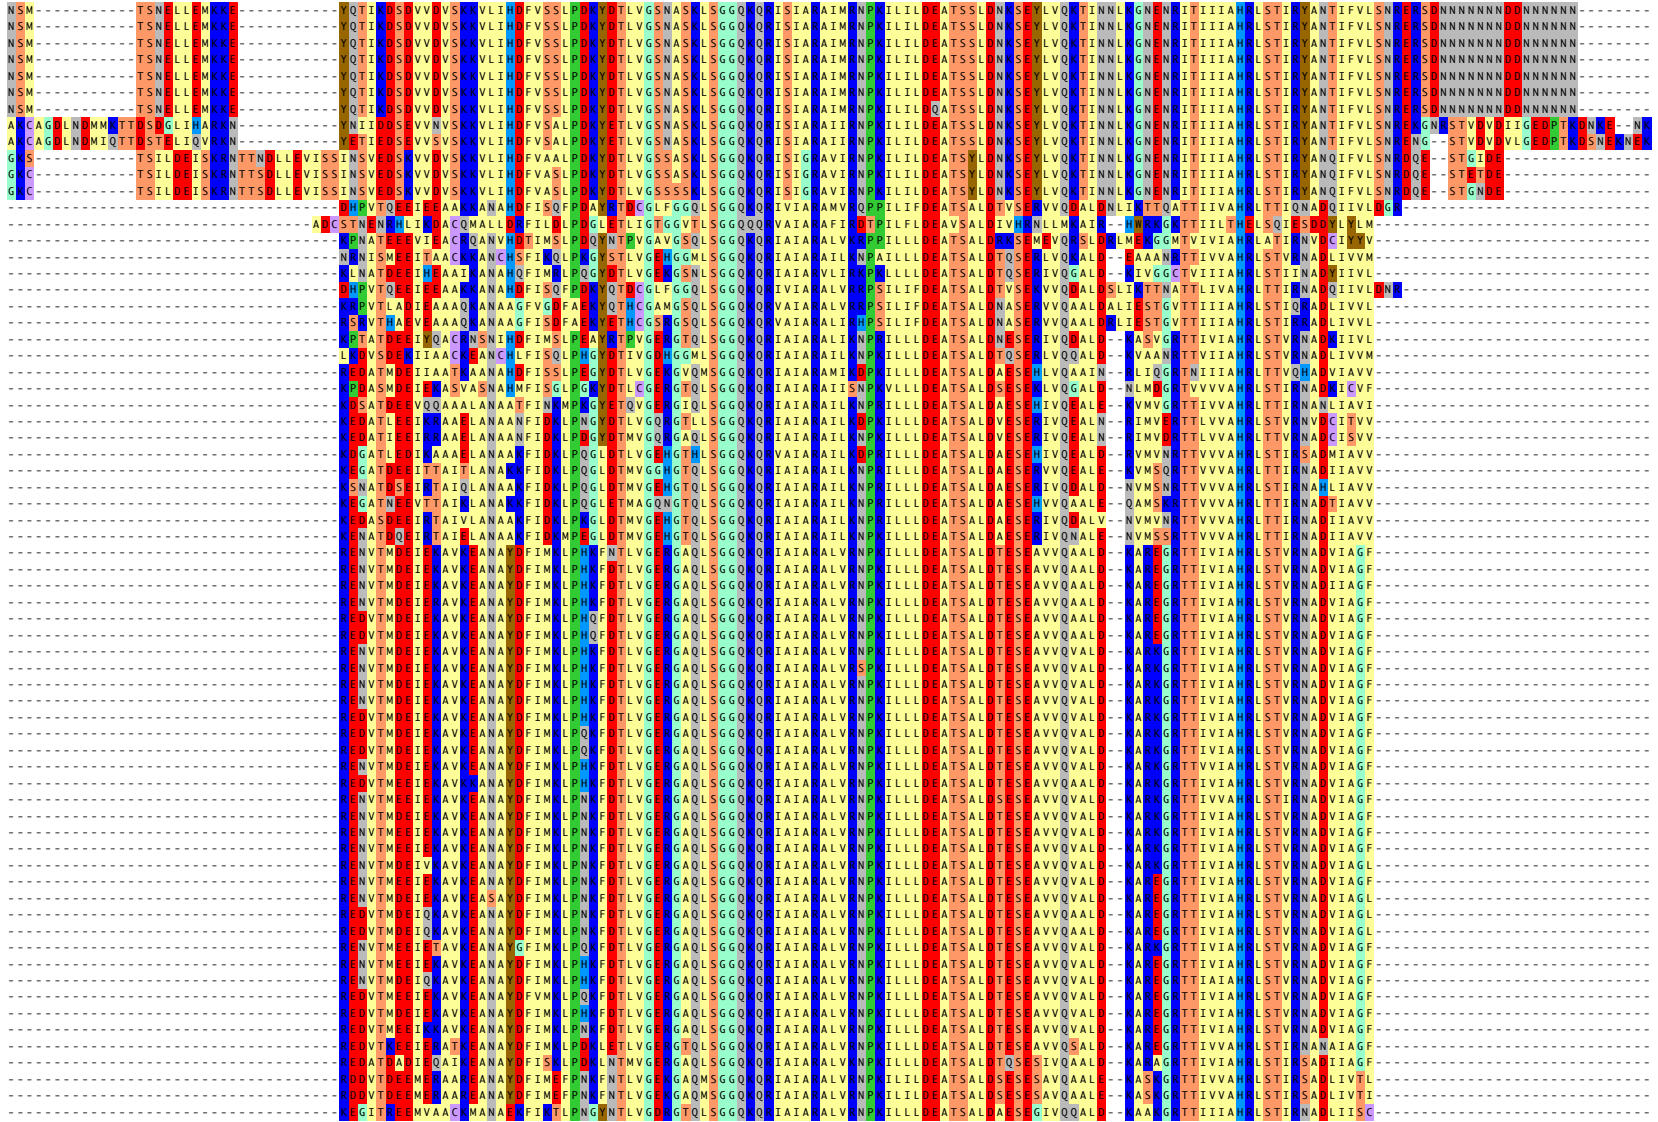





# TMD 10

# TMD 11

- P. falciptarum NYSND PF3D7\_0523000
- P. falciptarum NYSDD
- P. falciptarum YNSND
- P. falciptarum YFSND
- P. falciptarum YFSND
- P. falciptarum YFCNDY
- P. falciptarum 'inactive' NYSND
- P. knowlesi gi 221056887
- P. vivax gi 290564285
- P. chabaudi gi 2200636
- P. yoelii yoelii gi 83314634
- P. berghie anka gi 68076009
- N. caninum gi 401404748
- S. cerevisiae gi 6322640
- L. major Friedlin gi 157875614
- M. racemosus gi 13641444
- S. mansoni gi 425475
- T. gondii gi 237834513
- N. caninum Liverpool gi 401406932
- T. gondii gi 159024150
- C. owczarzakii ATCC 30864 gi 514486732
- M. delencar gi 384490636
- D. fasciculatum gi 328689303
- G. theta gi 428184723
- P. patens gi 168045570
- B. distachyon gi 357136048
- O. sativa gi 27368857
- C. japonica gi 384080871
- C. arretinum gi 502078526
- C. roseus gi 110226562
- G. max LOC100801771
- V. vinifera gi 225463358
- R. communis gi 255557453
- R. norvegicus gi 25453370
- R. norvegicus gi 25453402
- Cricetulus spp. gi 191155
- M. ochrogaster gi 532030804
- M. musculus gi 6755046
- M. musculus gi 387427 PDB C3GSUB
- H. sapiens gi 42741659 PDB 6C0V
- G. gorilla gi 426356791
- P. troglodytes gi 114614226
- P. abelii gi 395738781
- C. aethiops gi 60326712
- M. mulatta gi 74136329
- M. fascicularis gi 544421742
- C. jacchus gi 296209780
- O. garnetti gi 395818915
- F. catus gi 283906558
- C. lupus familiaris gi 67462127
- A. melanoleuca gi 301758332
- O. divergens gi 472383372
- E. callulus gi 545214020
- S. scrofa gi 335295539
- O. orca gi 465971828
- O. aries gi 125620444
- B. taurus gi 528930244
- E. telfairi gi 507646369
- C. porcellus gi 522580052
- H. glaber gi 513001951
- O. degus gi 507639834
- C. lamigera gi 533185054
- M. domestica gi 334348853
- X. tropicalis gi 148234563
- D. rerio gi 326674864
- P. paniscus gi 397509337
- M. mulatta gi 355960770
- C. elegans gi 17541710 PDB 4F4C

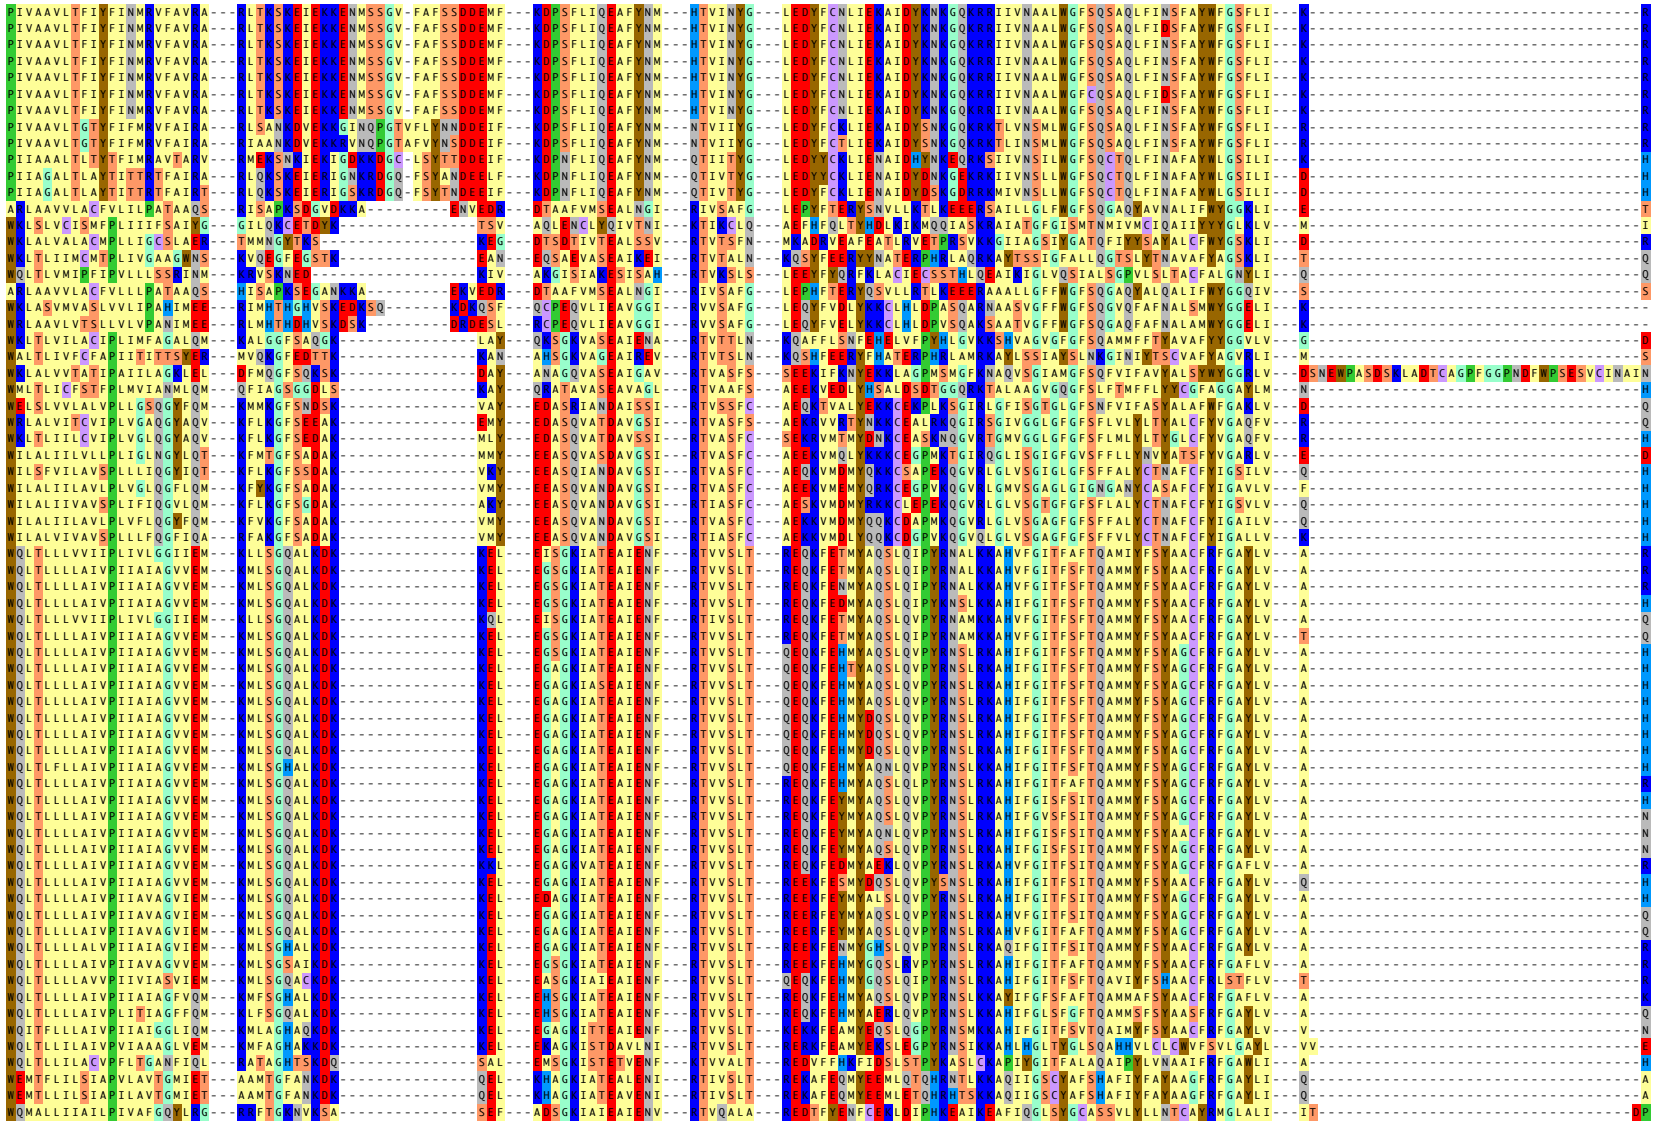



TMD 12

NBD 2... Walker A

- P. falciparum NYSND PF3D7\_0523000
P. falciparum NYSDD
P. falciparum YYSND
P. falciparum FYSND
P. falciparum YFSND
P. falciparum NCFDY
P. falciparum 'inactive' NYSND
P. knowlesi gi 221056887
P. vivax gi 290564285
P. chabaudi gi 2200636
P. yoelii yoelii gi 8314634
P. berghel anka gi 68076009
N. caninum gi 401404748
S. cerevisiae gi 6322940
L. major Friedlin gi 157875614
M. racemosus gi 13641444
S. mansoni gi 425475
T. gondii gi 237834513
N. caninum Liverpool gi 401406932
T. gondii gi 159024150
G. owarzacki ATCC 30864 gi 514486732
R. delaman gi 384490636
D. fasciculatum gi 328869303
G. theta gi 428184723
P. patens gi 168045570
B. distachyon gi 357136048
O. sativa gi 27368857
C. japonica gi 384080871
G. arletinum gi 502078526
C. roseus gi 110226562
G. max LOC100801771
V. vinifera gi 225463358
R. communis gi 255557453
R. norvegicus gi 25453370
R. norvegicus gi 25453402
Cricetulus spp. gi 191155
M. ochrogaster gi 532030804
M. musculus gi 6755046
M. musculus gi 387427 PDB C3G5UB
H. sapiens gi 42741659 PDB 6C0V
G. gorilla gi 426356791
P. troglodytes gi 114614226
P. abeille gi 395738781
C. aethiops gi 60326712
M. mulatta gi 74136329
M. fascicularis gi 544421742
C. jacchus gi 296209780
O. garrneti gi 395818915
F. catus gi 283806558
C. lupis familiaris gi 67462127
A. melanoleuca gi 301756332
O. divergens gi 472383372
E. callulus gi 545214020
S. scrofa gi 335295539
O. orca gi 465971828
O. aries gi 125620444
B. taurus gi 528930244
E. teliairi gi 507646369
C. porcellus gi 523580052
H. glaber gi 513001951
O. degus gi 507639834
C. lanigera gi 533186054
M. domestica gi 334348853
X. tropicalis gi 148234563
D. rerio gi 326674864
P. paniscus gi 397509337
M. mulatta gi 355500770
C. elegans gi 17541710 PDB 4F4C

Multiple sequence alignment table showing amino acid sequences for various species. The table is organized into columns corresponding to different regions of the protein, with color-coding used to highlight conserved residues. The species names are listed on the left side of the alignment.

...NBD 2

Q-loop

ABC signature

Walker B

- P. falciparum NYSND PF3D7\_0523000
- P. falciparum NF5DD
- P. falciparum Y5ND
- P. falciparum FY5ND
- P. falciparum YF5ND
- P. falciparum YF5CDY
- P. falciparum 'inactive' NYSND
- P. knowlesi gi 221056887
- P. vivax gi 290564285
- P. chabaudi gi 2200636
- P. yoelii yoelii gi 83314634
- P. berghel anka gi 66076009
- N. caninum gi 401404748
- S. cerevisiae gi 6322640
- L. major Friedlin gi 157875614
- M. racemousus gi 13641444
- S. mansoni gi 425475
- T. gondii gi 23784513
- N. caninum Liverpool gi 401406932
- T. gondii gi 159024160
- C. owczarzakii ATCC 30864 gi 514486732
- F. delamar gi 384490536
- D. fasciolarium gi 328869303
- G. theta gi 428184723
- P. patens gi 168045570
- B. distachyon gi 357136048
- O. sativa gi 27368857
- C. japonica gi 384080871
- C. arietinum gi 502078526
- C. roseus gi 110226562
- G. max LOC10080171
- V. vinifera gi 225463358
- R. communis gi 255557453
- R. norvegicus gi 25453370
- R. norvegicus gi 25453402
- Cricetulus spp. gi 191155
- M. ochrogaster gi 532030804
- M. musculus gi 6755046
- M. musculus gi 387427 PDB C3G5UB
- H. sapiens gi 42741659 PDB 6C0V
- G. gorilla gi 426356791
- P. troglodytes gi 114614226
- P. abelii gi 395738781
- C. aethiops gi 60326712
- M. mulatta gi 74136329
- M. fascicularis gi 544421742
- C. jachus gi 296209780
- O. garnetti gi 395818915
- F. catus gi 283806558
- C. lupus familiaris gi 67482127
- A. melanoleuca gi 301756332
- O. divergens gi 472383372
- E. callabus gi 545214020
- S. scrofa gi 335295539
- O. orca gi 465971828
- O. aries gi 125629444
- B. taurus gi 528930244
- E. telfairi gi 507646399
- C. porcellus gi 523580052
- H. glaber gi 513001951
- O. degus gi 507639834
- C. lanigera gi 533185054
- M. domestica gi 334348853
- X. tropicalis gi 148234563
- D. rerio gi 326674864
- P. paniscus gi 397509337
- M. mulatta gi 35560770
- C. elegans gi 17541710 PDB 4F4C

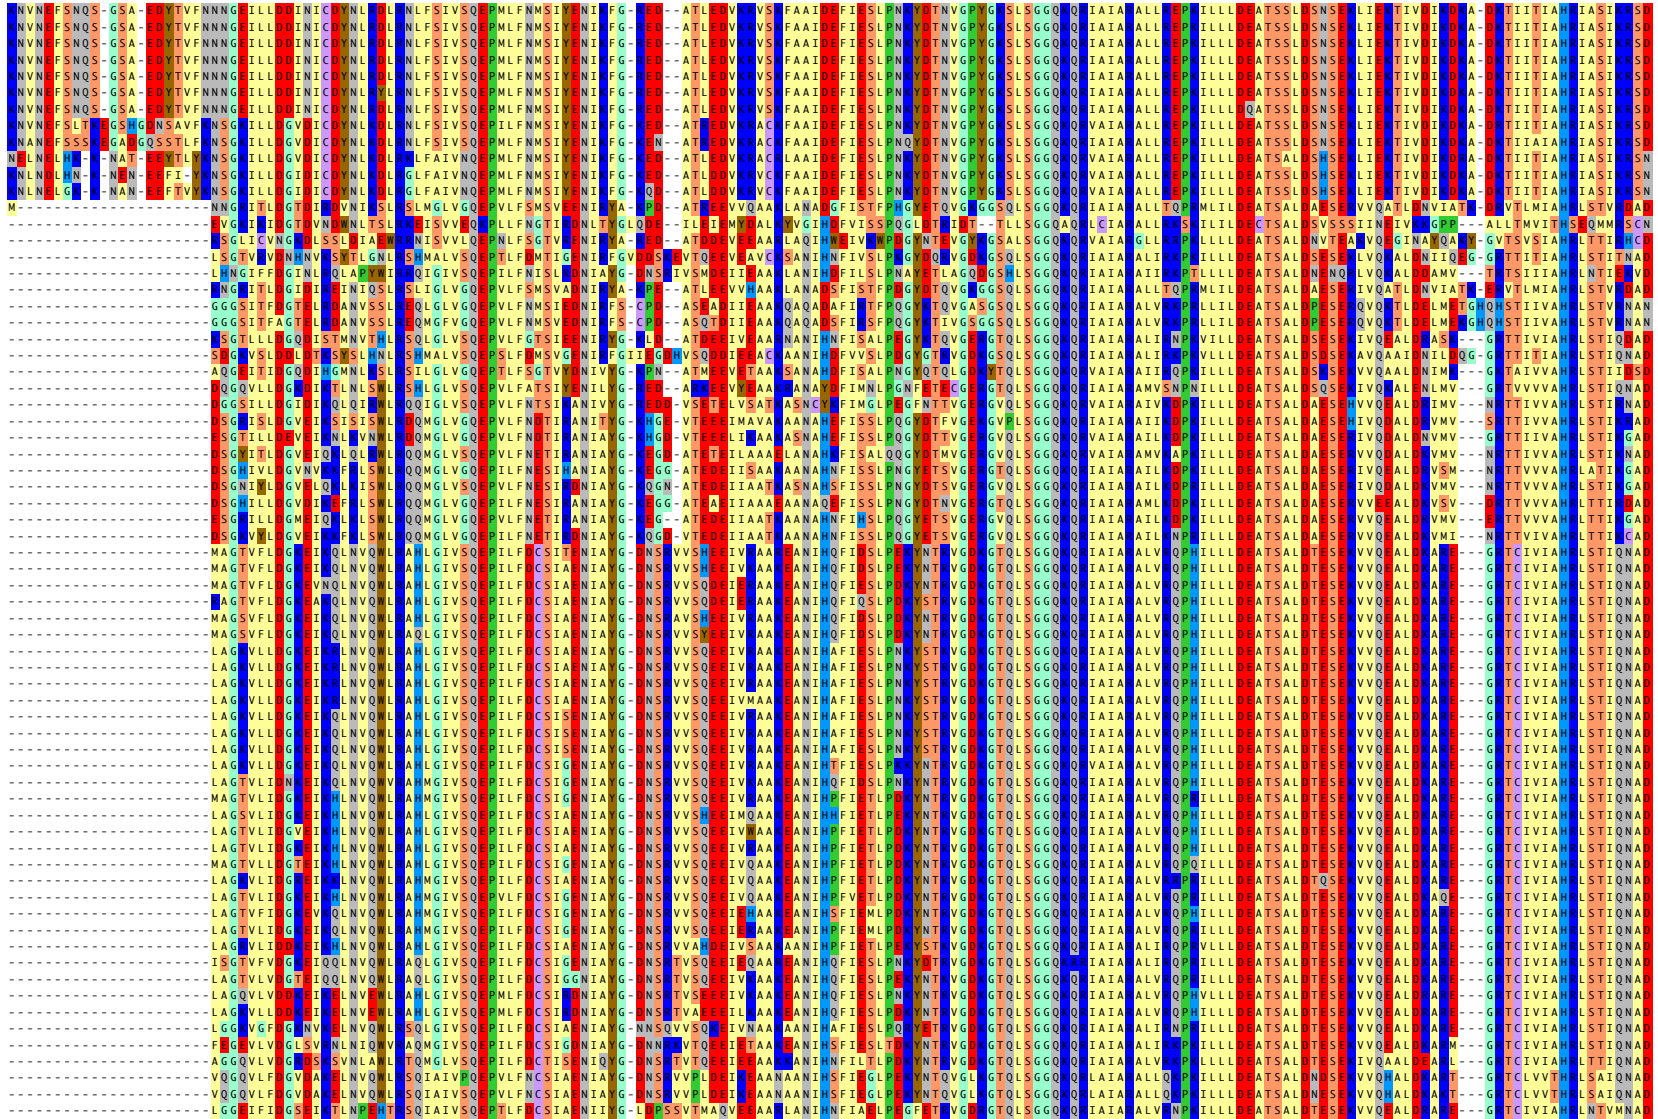

Supplement: pbio.3001616.s019.pdf [file pbio.3001616.s019.pdf]
