# Supplementary material for: Mechanistic basis for multidrug resistance and collateral drug sensitivity conferred to the malaria parasite by polymorphisms in PfMDR1 and PfCRT
Source: PubMed Central journal article supplement (PMC9067703; doi:10.1371/journal.pbio.3001616), 2022-05-04
Supplement: pbio.3001616.s011.pdf [file pbio.3001616.s011.pdf]

**S1 Table: Amino acid mutations in the PfMDR1 isoforms included for study.**

| PfMDR1 isoform | Origin             | Amino acid position in PfMDR1 |     |     |      |      |      |      |
|----------------|--------------------|-------------------------------|-----|-----|------|------|------|------|
|                |                    | 86                            | 184 | 588 | 1034 | 1042 | 1246 | 1337 |
| 3D7            | Africa and SE Asia | N                             | Y   | E   | S    | N    | D    | E    |
| HB3            | Honduras           | N                             | F   | E   | S    | D    | D    | E    |
| Dd2 or K1      | Africa             | Y                             | Y   | E   | S    | N    | D    | E    |
| Dd2            | Africa             | F                             | Y   | E   | S    | N    | D    | E    |
| GB4            | Africa             | Y                             | F   | E   | S    | N    | D    | E    |
| 7G8            | South America      | N                             | F   | E   | C    | D    | Y    | E    |
| inactive 3D7   | n.a.               | N                             | Y   | Q   | S    | N    | D    | Q    |
