# Supplementary material for: Mechanistic basis for multidrug resistance and collateral drug sensitivity conferred to the malaria parasite by polymorphisms in PfMDR1 and PfCRT
Source: PubMed Central journal article supplement (PMC9067703; doi:10.1371/journal.pbio.3001616), 2022-05-04
Supplement: pbio.3001616.s012.pdf [file pbio.3001616.s012.pdf]

**S2 Table: Amino acid mutations in the PfCRT isoforms included for study.**

| PfCRT isoform  | Origin             | Amino acid position in PfCRT |    |    |    |     |     |     |     |     |
|----------------|--------------------|------------------------------|----|----|----|-----|-----|-----|-----|-----|
|                |                    | 72                           | 74 | 75 | 76 | 220 | 271 | 326 | 356 | 371 |
| <b>3D7</b>     | Africa and SE Asia | C                            | M  | N  | K  | A   | Q   | N   | I   | R   |
| <b>Dd2</b>     | Africa             | C                            | I  | E  | T  | S   | E   | S   | T   | I   |
| <b>K1</b>      | Africa             | C                            | I  | E  | T  | S   | E   | S   | I   | I   |
| <b>GB4</b>     | Africa             | C                            | I  | E  | T  | S   | E   | N   | I   | I   |
| <b>7G8</b>     | South America      | S                            | M  | N  | T  | S   | Q   | D   | L   | R   |
| <b>Ecu1110</b> | South America      | C                            | M  | N  | T  | S   | Q   | D   | L   | R   |
