# Supplementary material for: Mechanistic basis for multidrug resistance and collateral drug sensitivity conferred to the malaria parasite by polymorphisms in PfMDR1 and PfCRT
Source: PubMed Central journal article supplement (PMC9067703; doi:10.1371/journal.pbio.3001616), 2022-05-04
Supplement: pbio.3001616.s013.pdf [file pbio.3001616.s013.pdf]

**S3 Table: *In vitro* drug resistance indices of *P. falciparum* strains for lumefantrine, mefloquine, chloroquine, and quinine.**

| Parasite strain <sup>a</sup>          | 3D7                              | HB3/GC03                | Dd2                      | K1                      | GB4                    | 7G8                     |
|---------------------------------------|----------------------------------|-------------------------|--------------------------|-------------------------|------------------------|-------------------------|
| PfMDR1 isoform                        | NYSND                            | NFSDD                   | YYSND & FYSND            | YYSND                   | YFSND                  | NFCDY                   |
| <i>In vitro</i> drug resistance index |                                  |                         |                          |                         |                        |                         |
| Lumefantrine <sup>b</sup>             | Valderramos et al. (2010) [1]    | 1.00                    |                          | 0.48                    |                        | 0.36                    |
|                                       | Van Tyne et al. (2011) [2]       | 1.00                    | 0.83                     | 0.87                    | 0.36                   | 0.36                    |
|                                       | Pelleau et al. (2015) [3]        | 1.00                    |                          |                         |                        | 0.35                    |
|                                       | Eastman et al. (2016) [4]        | 1.00                    | 1.12                     | 0.79                    |                        | 0.85                    |
|                                       | Ross et al. (2018) [5]           | 1.00                    |                          | 0.66                    |                        | 0.20                    |
|                                       | <b>Mean ± SEM or range/2 (n)</b> | <b>1.00 ± 0.00 (5)</b>  | <b>0.98 ± 0.15 (2)</b>   | <b>0.70 ± 0.08 (4)</b>  | <b>0.36 (1)</b>        | <b>0.85 (1)</b>         |
| Mefloquine <sup>b</sup>               | Durasingh et al. (2000) [6]      | 1.00                    | 0.47                     |                         | 0.35                   | 0.21                    |
|                                       | Reed et al. (2000) [7]           | 1.00                    |                          |                         |                        | 0.21                    |
|                                       | Johnson et al. (2004) [8]        | 1.00                    |                          | 2.14                    | 0.77                   | 0.45                    |
|                                       | Lakshmanan et al. (2005) [9]     | 1.00                    |                          | 1.31                    |                        |                         |
|                                       | Baniecki et al. (2007) [10]      | 1.00                    | 0.78                     | 2.12                    |                        |                         |
|                                       | Van Tyne et al. (2011) [2]       | 1.00                    | 0.54                     | 0.72                    | 0.65                   |                         |
|                                       | Yuan et al. (2011) [11]          | 1.00                    | 0.51                     | 0.61                    |                        | 0.07                    |
|                                       | Chugh et al. (2015) [12]         | 1.00                    | 1.03                     | 1.40                    | 0.53                   |                         |
|                                       | Eastman et al. (2016) [4]        | 1.00                    | 1.58                     | 0.79                    |                        | 0.76                    |
|                                       | Ross et al. (2018) [5]           | 1.00                    |                          | 1.33                    |                        | 0.22                    |
| <b>Mean ± SEM or range/2 (n)</b>      | <b>1.00 ± 0.00 (10)</b>          | <b>0.82 ± 0.17 (6)</b>  | <b>1.30 ± 0.21 (8)</b>   | <b>0.58 ± 0.09 (4)</b>  | <b>0.42 ± 0.35 (2)</b> | <b>0.25 ± 0.04 (7)</b>  |
| Chloroquine <sup>b</sup>              | Foote et al. (1990) [13]         | 1.10                    | 1.00                     |                         | 16.00                  | 2.89                    |
|                                       | Durasingh et al. (2000) [6]      | 1.04                    | 1.00                     |                         |                        |                         |
|                                       | Fidock et al. (2000) [14]        | 0.53                    | 1.00                     | 5.45                    |                        |                         |
|                                       | Mehlotra et al. (2001) [15]      | 0.38                    | 1.00                     | 8.00                    | 20.00                  | 3.62                    |
|                                       | Mu et al. (2003) [16]            | 0.57                    | 1.00                     | 11.90                   |                        | 6.50                    |
|                                       | Johnson et al. (2004) [8]        | 0.59                    | 1.00                     | 6.72                    |                        | 4.83                    |
|                                       | Lakshmanan et al. (2005) [9]     | 1.11                    | 1.00                     | 12.77                   |                        |                         |
|                                       | Baniecki et al. (2007) [10]      | 1.33                    | 1.00                     | 13.16                   |                        |                         |
|                                       | Sá et al. (2009) [17]            |                         | 1.00                     | 13.59                   |                        | 11.77                   |
|                                       | Mu et al. (2010) [18]            | 0.58                    | 1.00                     | 8.37                    |                        | 11.84                   |
|                                       | Valderramos et al. (2010) [1]    | 0.97                    | 1.00                     | 8.87                    |                        |                         |
|                                       | Sanchez et al. (2011) [19]       |                         | 1.00                     | 7.53                    |                        | 5.99                    |
|                                       | Van Tyne et al. (2011) [2]       | 0.91                    | 1.00                     | 7.51                    | 8.84                   |                         |
|                                       | Griffin et al. (2012) [20]       |                         | 1.00                     | 11.60                   | 12.00                  |                         |
|                                       | Chugh et al. (2015) [12]         | 1.00                    | 1.00                     | 20.10                   | 23.75                  |                         |
|                                       | Reiling et al. (2015) [21]       | 0.51                    | 1.00                     | 3.60                    |                        |                         |
|                                       | Ross et al. (2018) [5]           | 0.94                    | 1.00                     | 16.30                   |                        |                         |
| This study (S4 Text)                  | 0.68                             | 1.00                    | 7.16                     |                         |                        |                         |
| <b>Mean ± SEM (n)</b>                 | <b>0.82 ± 0.07 (15)</b>          | <b>1.00 ± 0.00 (18)</b> | <b>10.16 ± 1.08 (16)</b> | <b>16.12 ± 2.68 (5)</b> | <b>9.87 ± 1.94 (3)</b> | <b>5.71 ± 0.57 (10)</b> |
| Quinine <sup>b</sup>                  | Durasingh et al. (2000) [6]      | 1.00                    | 1.21                     |                         |                        |                         |
|                                       | Chen et al. (2003) [22]          | 1.00                    |                          |                         | 3.11                   | 1.89                    |
|                                       | Mu et al. (2003) [16]            | 1.00                    | 2.50                     | 3.95                    |                        | 1.54                    |
|                                       | Johnson et al. (2004) [8]        | 1.00                    |                          | 6.47                    |                        | 1.78                    |
|                                       | Lakshmanan et al. (2005) [9]     | 1.00                    |                          | 4.93                    |                        |                         |
|                                       | Mu et al. (2010) [18]            | 1.00                    | 3.73                     | 4.09                    |                        | 3.22                    |
|                                       | Valderramos et al. (2010) [1]    | 1.00                    |                          | 5.25                    |                        |                         |
|                                       | Van Tyne et al. (2011) [2]       | 1.00                    | 0.83                     | 3.21                    | 3.17                   |                         |
|                                       | Ross et al. (2018) [5]           | 1.00                    |                          | 6.25                    |                        | 3.07                    |
|                                       | This study (S4 Text)             | 1.00                    | 2.76                     | 4.68                    |                        | 1.58                    |
| <b>Mean ± SEM or range/2 (n)</b>      | <b>1.00 ± 0.00 (10)</b>          | <b>2.20 ± 0.53 (5)</b>  | <b>4.86 ± 0.40 (8)</b>   | <b>3.14 ± 0.03 (2)</b>  | <b>3.22 (1)</b>        | <b>1.97 ± 0.28 (5)</b>  |

<sup>a</sup>The PfCRT isoform expressed by the 3D7 and HB3/GC03 strains is PfCRT<sup>3D7</sup>. The other parasite strains express the PfCRT isoform indicated by their name, e.g., the Dd2 strain expresses PfCRT<sup>Dd2</sup> (see S2 Table).

<sup>b</sup>The *in vitro* drug resistance indices for lumefantrine, mefloquine, and quinine were calculated by dividing the IC<sub>50</sub> value measured in each strain by the IC<sub>50</sub> value determined in the same study for 3D7 parasites. However, the *in vitro* resistance indices for chloroquine were calculated by dividing the IC<sub>50</sub> value measured in each strain by the IC<sub>50</sub> value determined in the same study for HB3 or GC03 parasites because in some of these studies, the chloroquine IC<sub>50</sub> value for 3D7 parasites was not determined (i.e. the HB3 or GC03 strains were used as the chloroquine-sensitive control strains in these studies).
