# Supplementary material for: Mechanistic basis for multidrug resistance and collateral drug sensitivity conferred to the malaria parasite by polymorphisms in PfMDR1 and PfCRT
Source: PubMed Central journal article supplement (PMC9067703; doi:10.1371/journal.pbio.3001616), 2022-05-04
Supplement: pbio.3001616.s014.pdf [file pbio.3001616.s014.pdf]

**S4 Table: Generation of PfMDR1 coding sequences for expression in *Xenopus* oocytes.**

| Template                | Mutation or tag   | Forward primer 5'→3' <sup>a</sup>                | Reverse primer 5'→3' <sup>a</sup>                                                                                                                          | Resulting construct                 |
|-------------------------|-------------------|--------------------------------------------------|------------------------------------------------------------------------------------------------------------------------------------------------------------|-------------------------------------|
| PfMDR1 <sup>NYSND</sup> | N86Y              | CATGtatCTGGGGGA                                  | CCAGataCATGTTCTTCAG                                                                                                                                        | PfMDR1 <sup>YYSND</sup>             |
| PfMDR1 <sup>NYSND</sup> | N86F              | CATGttcCTGGGGGATGATAT                            | CCAGgaaCATGTTCTTCAGAATC                                                                                                                                    | PfMDR1 <sup>FYSND</sup>             |
| PfMDR1 <sup>NYSND</sup> | N86Y,<br>Y184F    | CATGtatCTGGGGGA<br>CTGGGGCTTttATTTGGTCG          | CATGtatCTGGGGGA<br>CAAATaaaAAGCCCCAGGAACG                                                                                                                  | PfMDR1 <sup>YFSND</sup>             |
| PfMDR1 <sup>NYSND</sup> | Y184F,<br>N1042D  | CTGGGGCTTttATTTGGTCG<br>TGTTTATTgatAGTTTCGCGTAC  | CAAATaaaAAGCCCCAGGAACG<br>GTACGCGAAACTatcAATAAACA                                                                                                          | PfMDR1 <sup>NFSDD</sup>             |
| PfMDR1 <sup>NFSDD</sup> | S1034C,<br>D1246Y | GGTTTCtgtCAATCGGCGCAA<br>CCTGAGGtatCTTAGAAA      | CGATTGacaGAAACCCCATAG<br>TTTCTAAGataCCTCAGG                                                                                                                | PfMDR1 <sup>NFCDY</sup>             |
| PfMDR1 <sup>NYSND</sup> | E588Q,<br>E1337Q  | CTAATTCTTGACcagGCAACAAG<br>GCTTCTGGACcagGCTACAAG | CTTGTTGCctgGTCAAGAATTAG<br>CTTGTAGCctgGTCCAGAAGC                                                                                                           | inactive<br>PfMDR1 <sup>NYSND</sup> |
| PfMDR1 <sup>NYSND</sup> | 2xHA              | CG <b>AGGATCC</b> GCCGCCACCATGG<br>GCAAA         | CG <b>AGAATTC</b> TTA <i>tgcatagtcaggaac</i><br><i>atcataaggatatgccactgctgcatagtcagg</i><br><i>aacatcatatggata</i> GGCCACGGCTTT<br>TGCCAGTTTTCACATACTTTTTG | PfMDR1 <sup>NYSND</sup> _<br>2xHA   |

<sup>a</sup>Mutated codons are shown in lowercase, restriction enzyme sites are shown in bold, the synthetic Kozak sequence is shown in italicized uppercase, and the coding sequence of the 2x hemagglutinin (HA)-tag is shown in italicized lowercase.
