# Supplementary material for: Mechanistic basis for multidrug resistance and collateral drug sensitivity conferred to the malaria parasite by polymorphisms in PfMDR1 and PfCRT
Source: PubMed Central journal article supplement (PMC9067703; doi:10.1371/journal.pbio.3001616), 2022-05-04
Supplement: pbio.3001616.s016.pdf [file pbio.3001616.s016.pdf]

## **S2 Text: Direct measurement of the transport of fluorescent compounds via PfMDR1.**

The radiolabeled drug transport assay was repurposed to measure the PfMDR1-mediated transport of compounds with inherent fluorescence. Three fluorescent compounds — methylene blue and quinacrine (the first synthetic antimalarials to be deployed), as well as rhodamine B (a fluorescent dye) — have previously been identified as substrates of human P-gp [1, 2]. We confirmed these findings by demonstrating that all three compounds were effluxed from oocytes expressing human P-gp (S1 Data), and we also showed that these compounds were substrates of PfMDR1 (Fig 2 and S1 Data). The low level of leakage from the negative control oocytes (non-expressing oocytes and those expressing PfNT1) was most likely due to simple diffusion of the neutral species of the compound.

### **References**

1. Eytan GD, Regev R, Oren G, Hurwitz CD, Assaraf YG. Efficiency of P-glycoprotein-mediated exclusion of rhodamine dyes from multidrug-resistant cells is determined by their passive transmembrane movement rate. *Eur J Biochem.* 1997;15: 104-112.
2. Senarathna SM, Page-Sharp M, Crowe A. The interactions of P-glycoprotein with antimalarial drugs, including substrate affinity, inhibition and regulation. *PLoS one.* 2016;11: e0152677.
